# Supplementary material for: Positive Effect of Acetylation on Proteomic Analysis Based on Liquid Chromatography with Atmospheric Pressure Chemical Ionization and Photoionization Mass Spectrometry
Source: MDPI journal article supplement (doi:10.3390/molecules28093711), 2023-04-25
Supplement: s1 [file s1]

# Positive Effect of Acetylation on Proteomic Analysis Based on Liquid Chromatography with Atmospheric Pressure Chemical Ionization and Photoionization Mass Spectrometry

Simona Sedláčková<sup>1,2</sup>, Martin Hubálek<sup>1</sup>, Vladimír Vrkoslav<sup>1</sup>, Miroslava Blechová<sup>1</sup>, Petr Kozlík<sup>2</sup> and Josef Cvačka<sup>1,2\*</sup>

<sup>1</sup> Institute of Organic Chemistry and Biochemistry of the Czech Academy of Sciences, Prague, Czech Republic

<sup>2</sup> Department of Analytical Chemistry, Faculty of Science, Charles University, Prague, Czech Republic

\* Correspondence: josef.cvacka@uochb.cas.cz; Tel.: (+420 220 183 303)

|                                                                           |    |
|---------------------------------------------------------------------------|----|
| Figure S1. FTMS spectra of acetylated SLGE .....                          | 2  |
| Figure S2. MS <sup>2</sup> spectra of acetylated SLGE .....               | 3  |
| Figure S3. MS <sup>2</sup> spectra of acetylated SLGE .....               | 4  |
| Figure S4. FTMS spectra of acetylated SLGK .....                          | 5  |
| Figure S5. MS <sup>2</sup> spectra of acetylated SLGK .....               | 6  |
| Figure S6. FTMS spectra of acetylated VASLF .....                         | 7  |
| Figure S7. MS <sup>2</sup> spectra of acetylated VASLF .....              | 8  |
| Figure S8. MS <sup>2</sup> spectra of acetylated VASLF .....              | 9  |
| Figure S9. FTMS spectra of acetylated QTALVELLF .....                     | 10 |
| Figure S10. MS <sup>2</sup> spectra of acetylated QTALVELLF .....         | 11 |
| Figure S11. FTMS spectra of acetylated AWSVAE .....                       | 12 |
| Figure S12. MS <sup>2</sup> spectra of acetylated AWSVAE .....            | 13 |
| Figure S13. FTMS spectra of acetylated SLGF .....                         | 14 |
| Figure S14. MS <sup>2</sup> spectra of acetylated SLGF .....              | 15 |
| Figure S15. FTMS spectra of acetylated VCLASSAF .....                     | 16 |
| Figure S16. MS <sup>2</sup> spectra of acetylated VCLASSAF .....          | 17 |
| Figure S17. FTMS spectra of acetylated QTALVELLE .....                    | 18 |
| Figure S18. MS <sup>2</sup> spectra of acetylated QTALVELLE .....         | 19 |
| Table S1. Peptides detected by APPI in BSA digested by chymotrypsin ..... | 20 |
| Table S2. Peptides detected by APCI in BSA digested by chymotrypsin ..... | 21 |
| Table S3. Peptides detected by ESI in BSA digested by chymotrypsin .....  | 22 |
| Table S4. Peptides detected by APPI in BSA digested by Glu-C .....        | 23 |
| Table S5. Peptides detected by APCI in BSA digested by Glu-C .....        | 24 |
| Table S6. Peptides detected by ESI in BSA digested by Glu-C .....         | 25 |

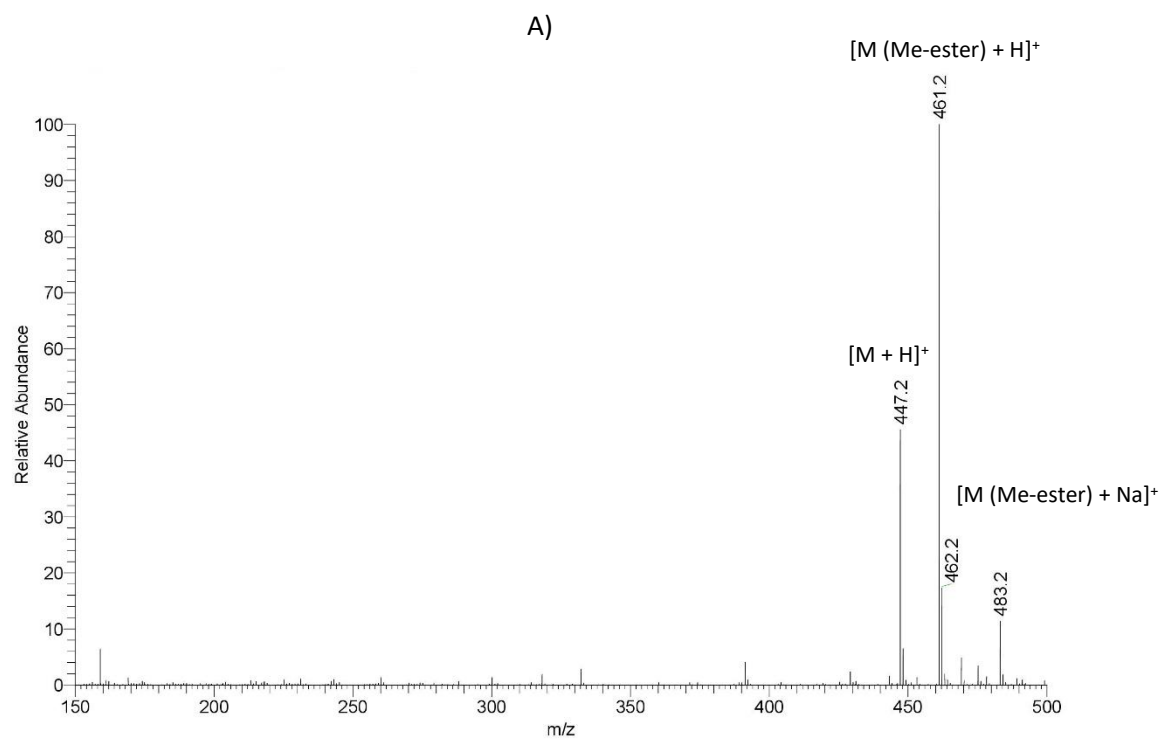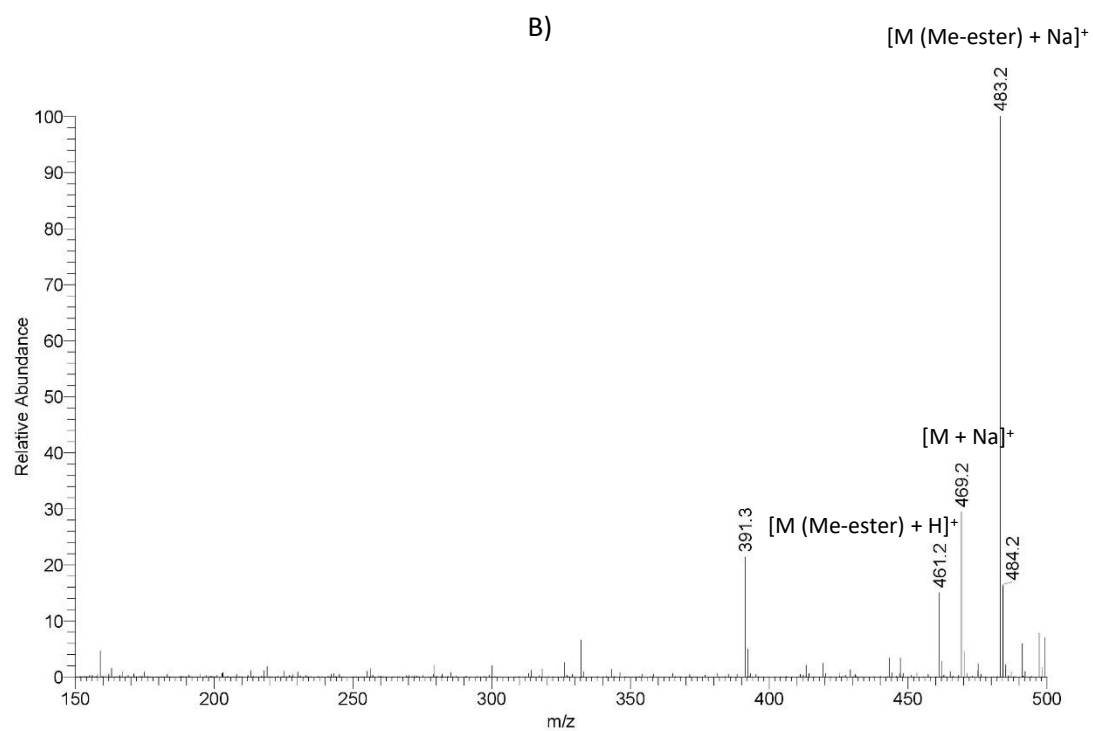

**Figure S1.** FTMS spectra of acetylated SLGE detected in A) APCI and B) APPI.

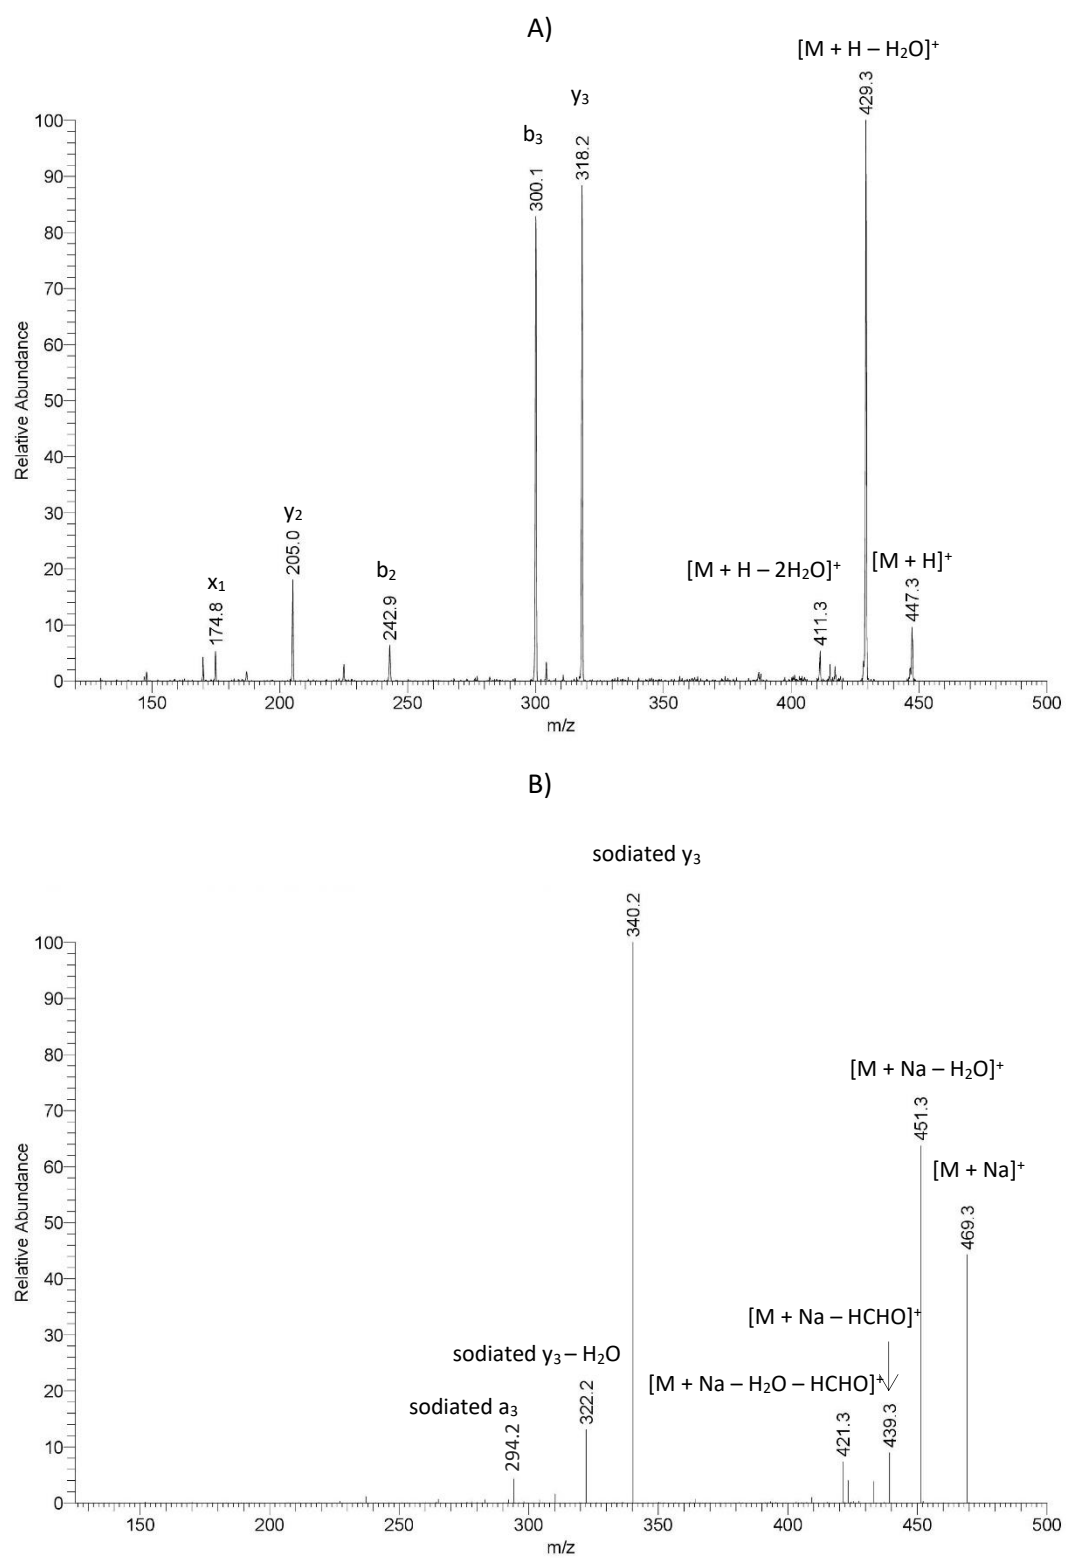

**Figure S2.** MS<sup>2</sup> spectra of acetylated SLGE A) precursor  $[M + H]^+$   $m/z$  447.3, B) precursor  $[M + Na]^+$   $m/z$  469.3.

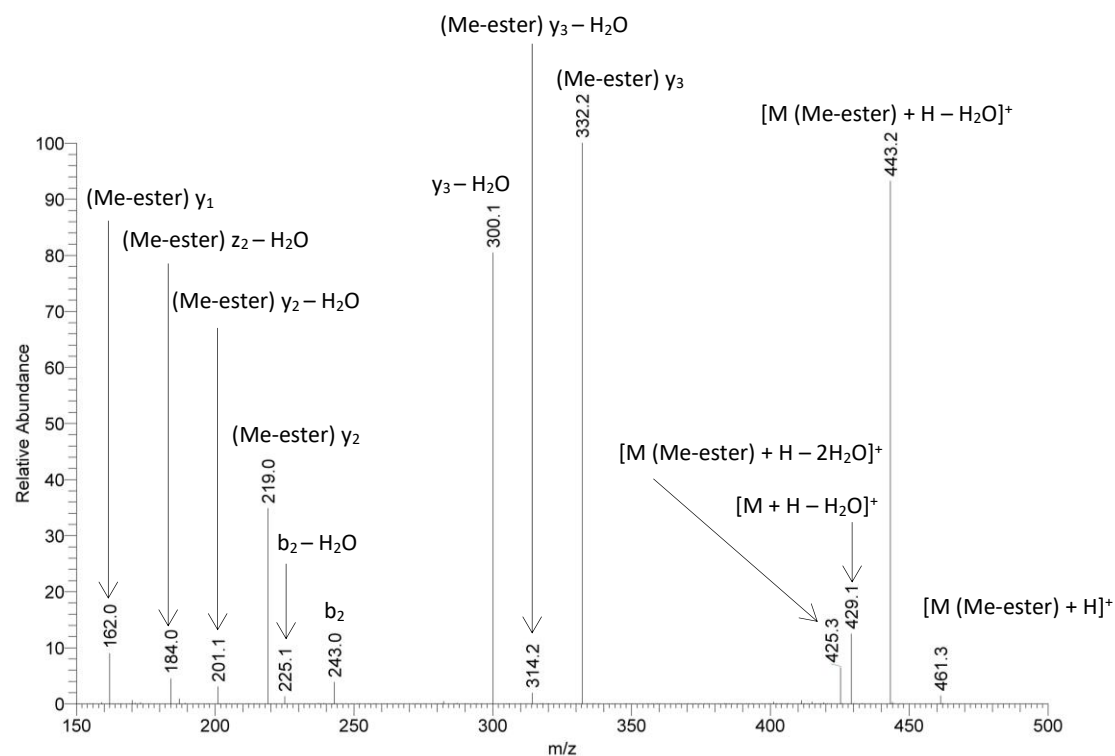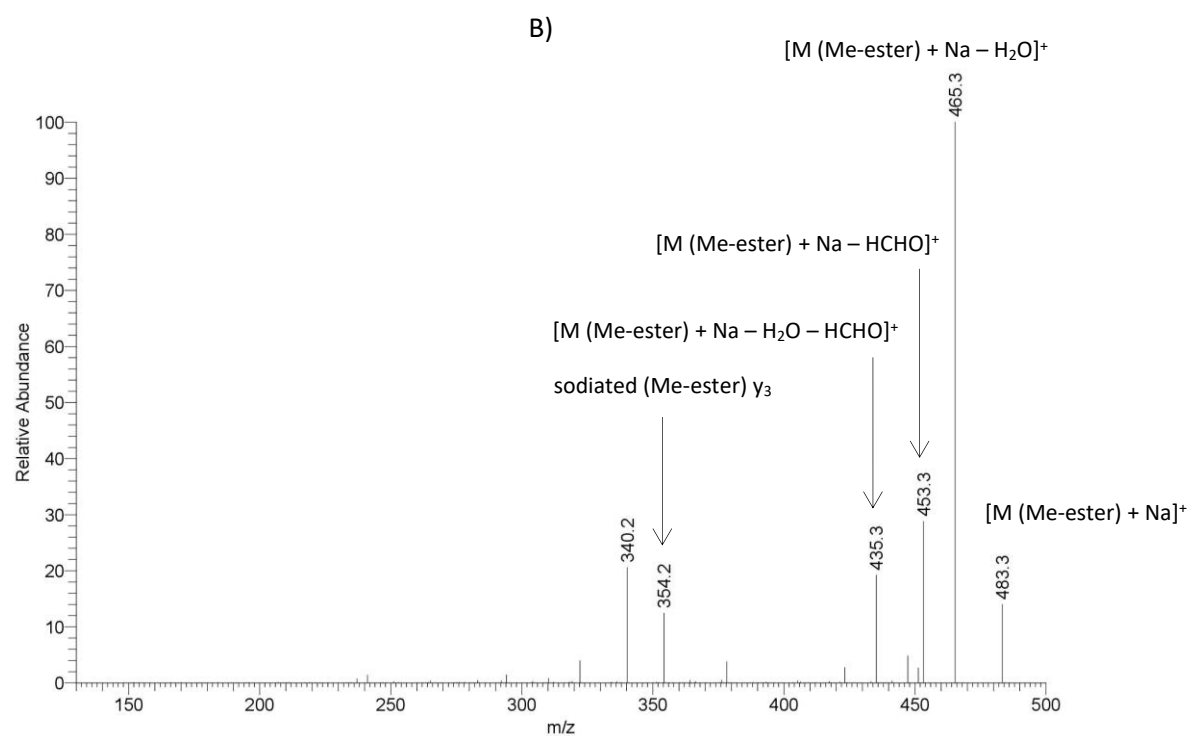

**Figure S3.** MS<sup>2</sup> spectra of acetylated SLGE A) precursor  $[M (\text{Me-ester}) + \text{H}]^+$   $m/z$  461.3, B)  $[M (\text{Me-ester}) + \text{Na}]^+$   $m/z$  483.3.

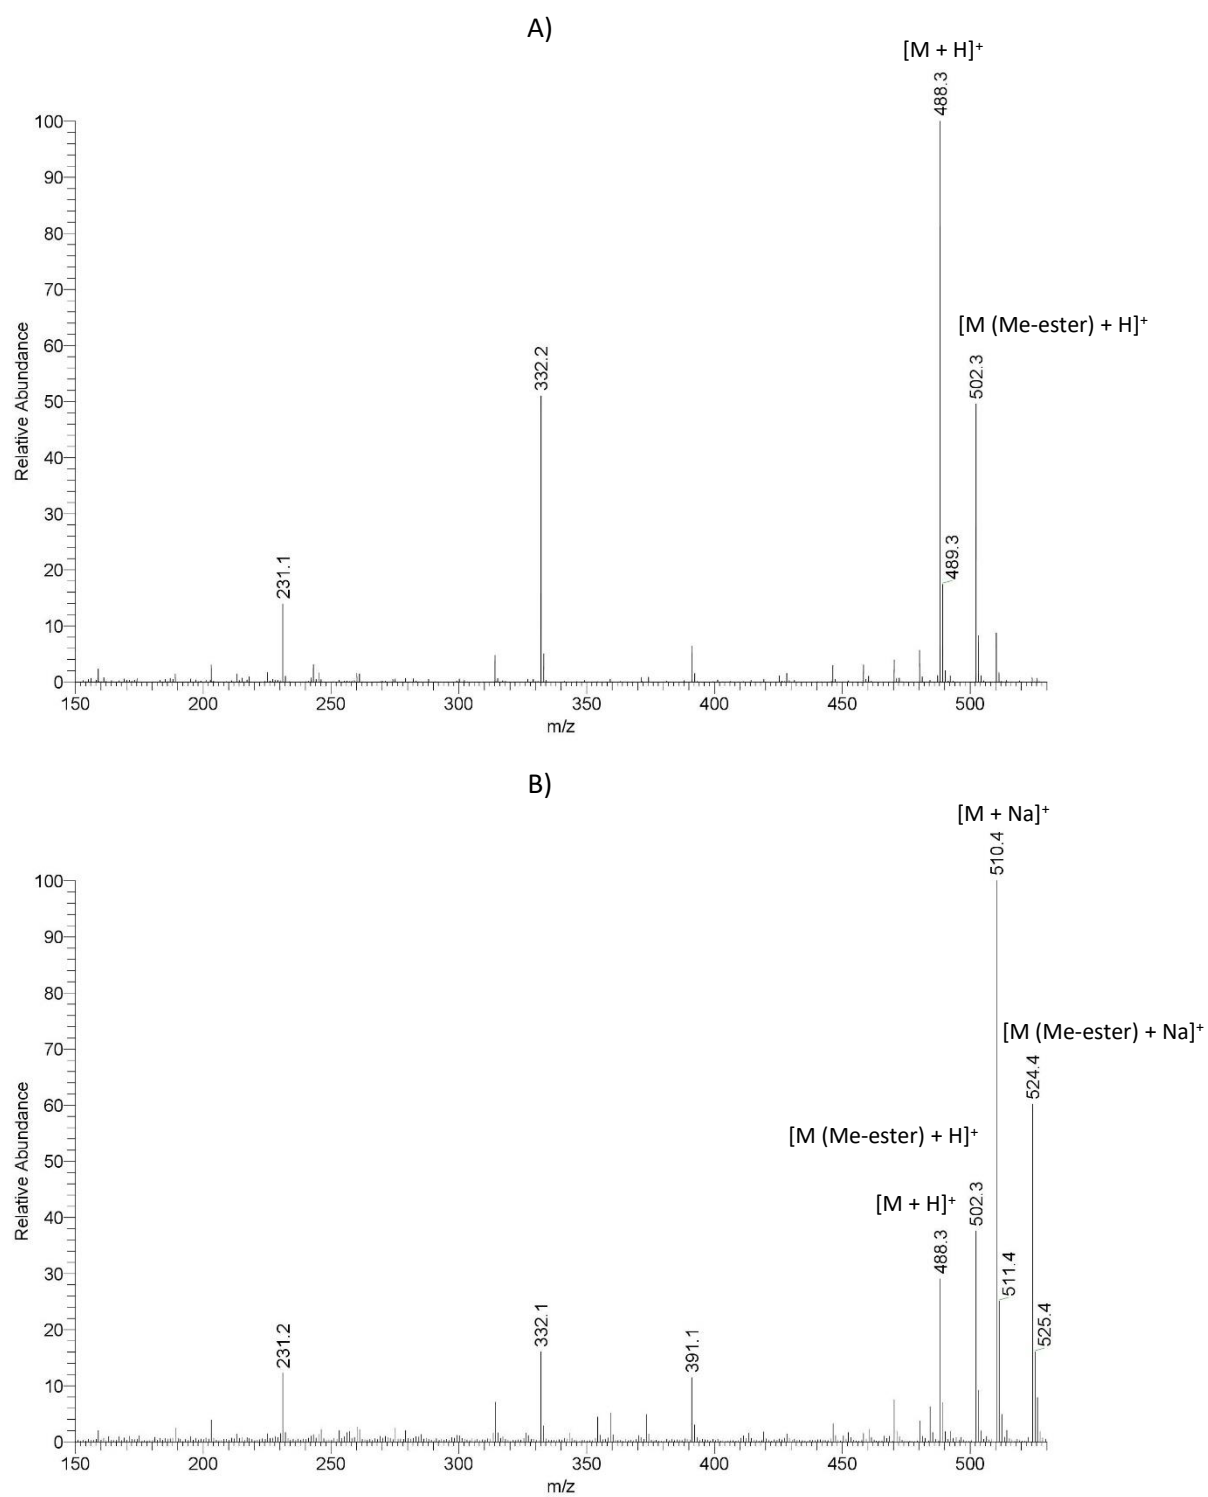

**Figure S4.** FTMS spectra of acetylated SLGK detected in A) APCI and B) APPI.

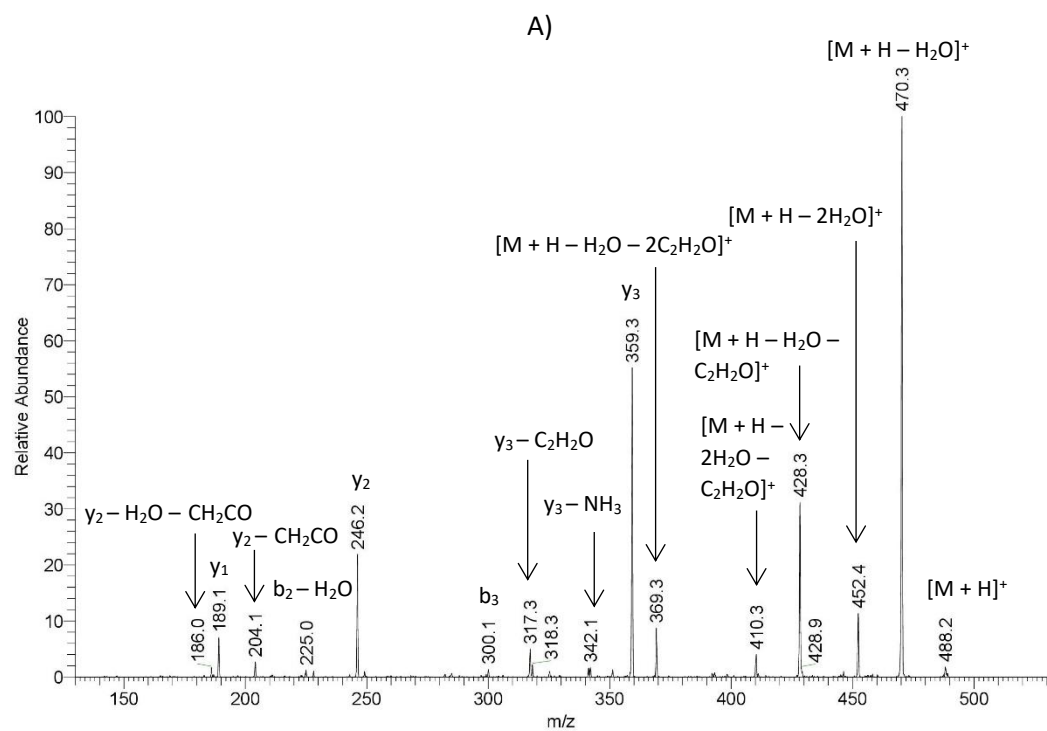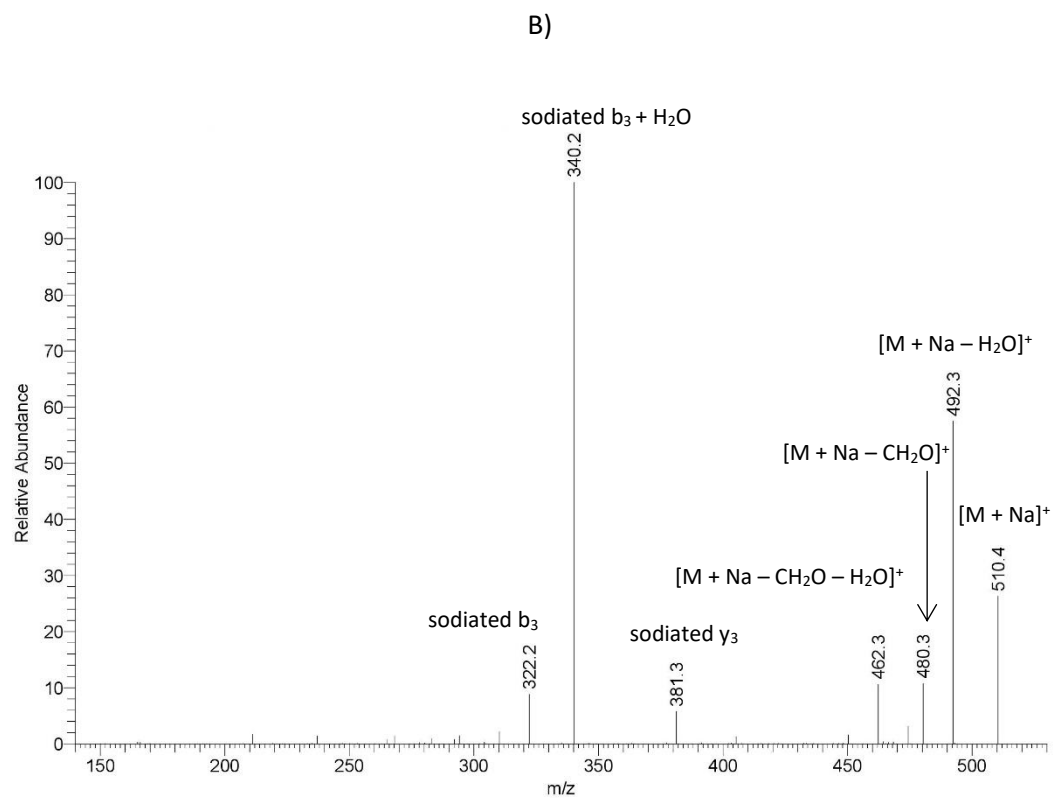

**Figure S5.** MS<sup>2</sup> spectra of acetylated SLGK A) precursor  $[M + H]^+$   $m/z$  488.3, B) precursor  $[M + Na]^+$   $m/z$  510.4.

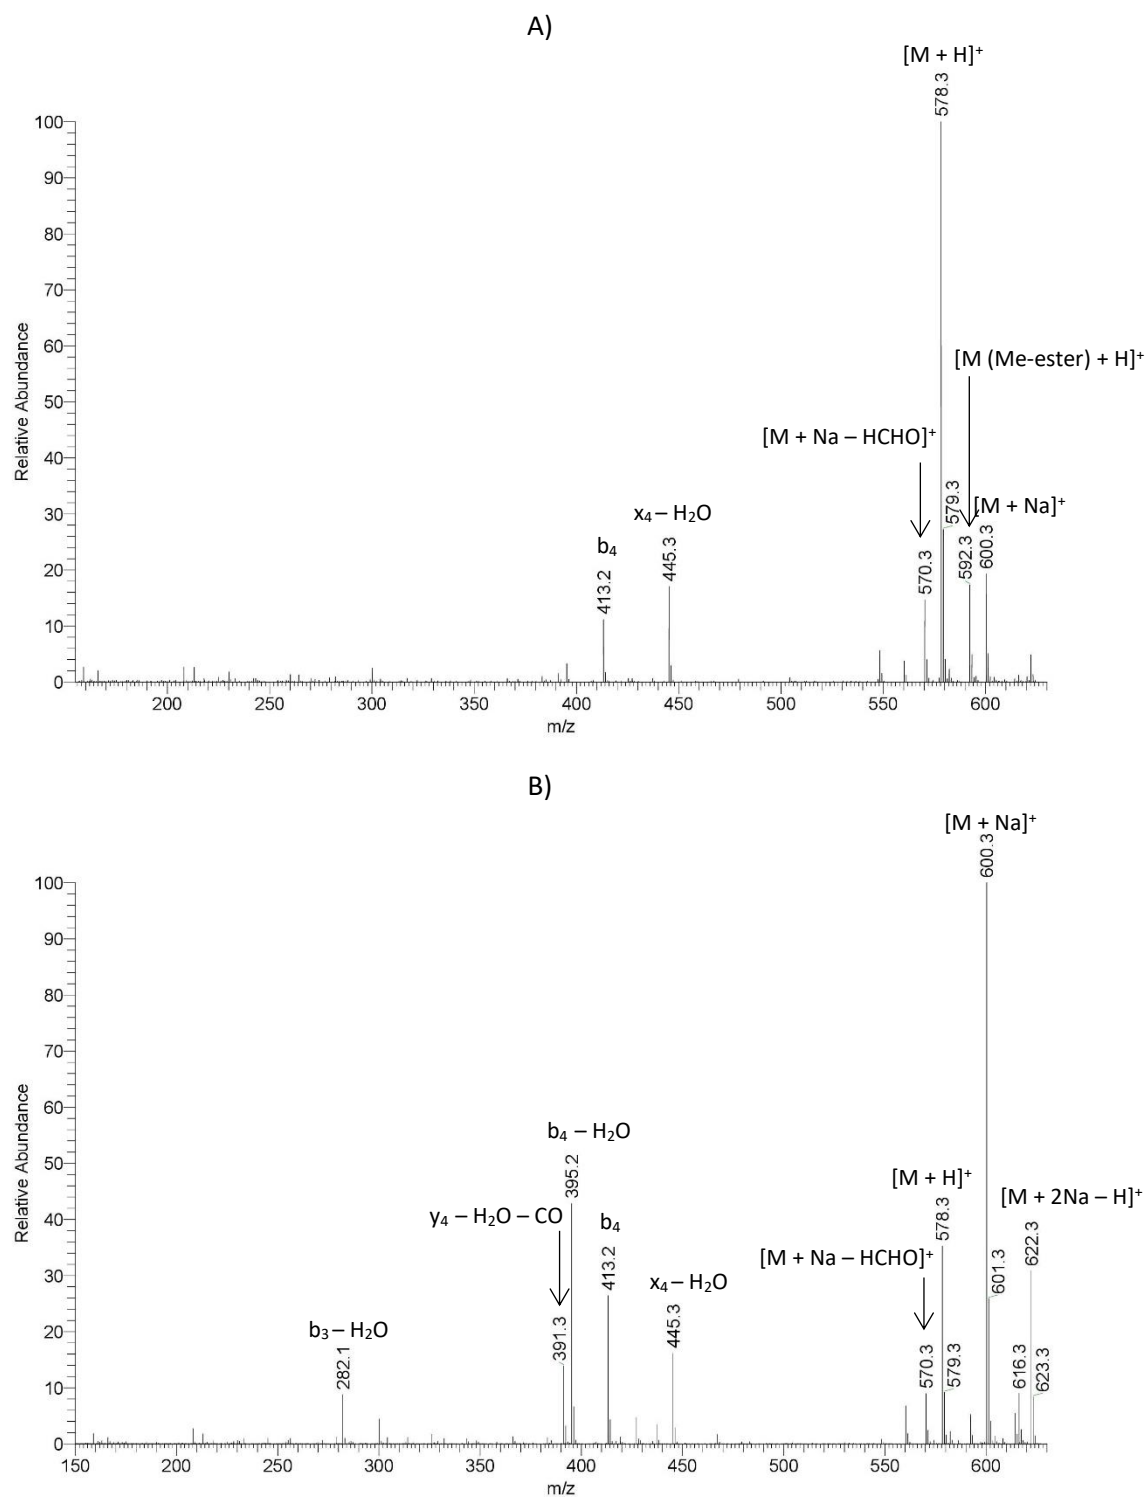

**Figure S6.** FTMS spectra of acetylated VASLF detected in A) APCI and B) APPI.

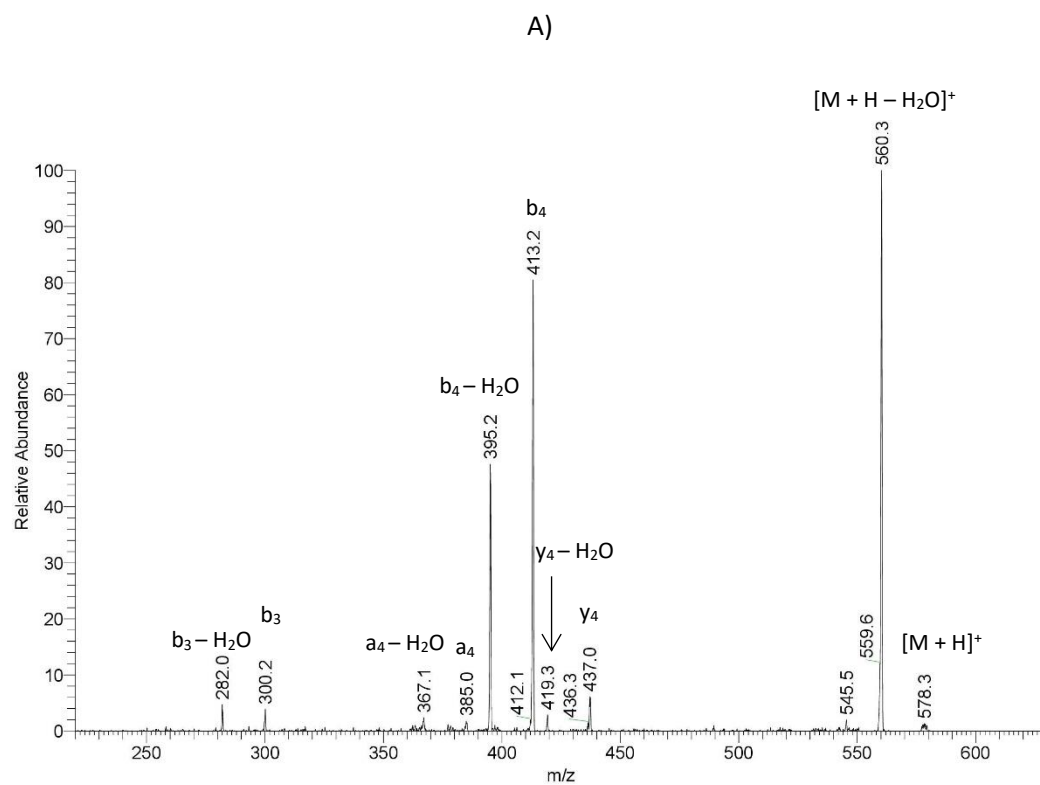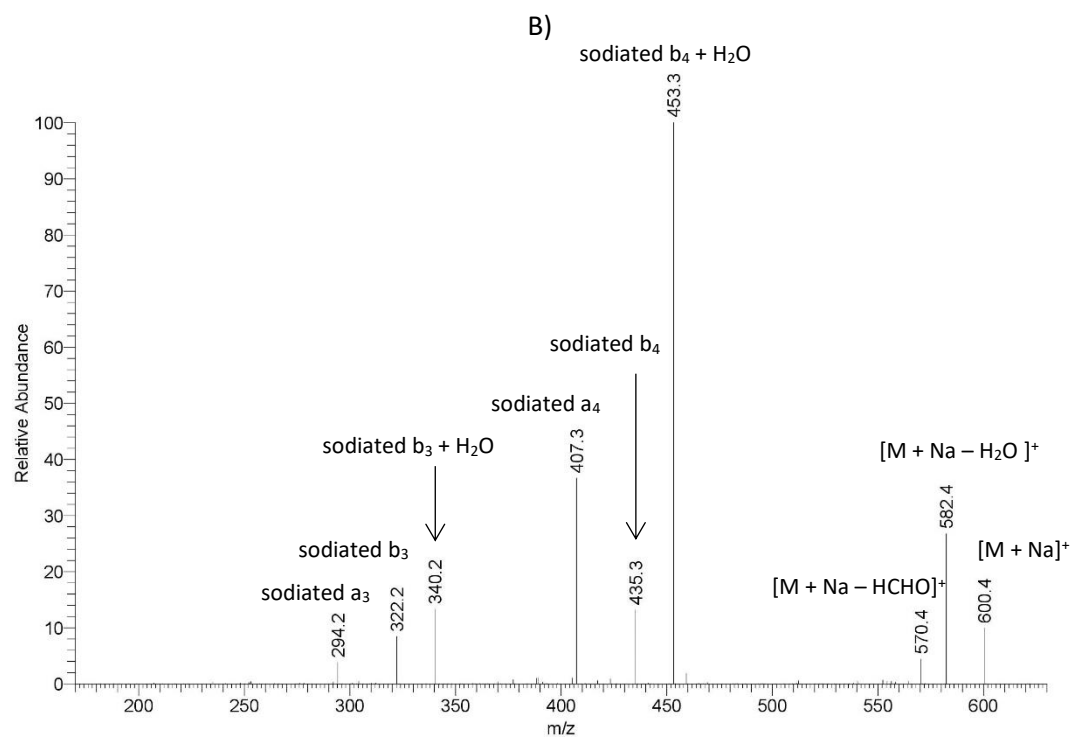

**Figure S7.** MS<sup>2</sup> spectra of acetylated VASLF A) precursor  $[M + H]^+$   $m/z$  578.3, B) precursor  $[M + Na]^+$   $m/z$  600.4.



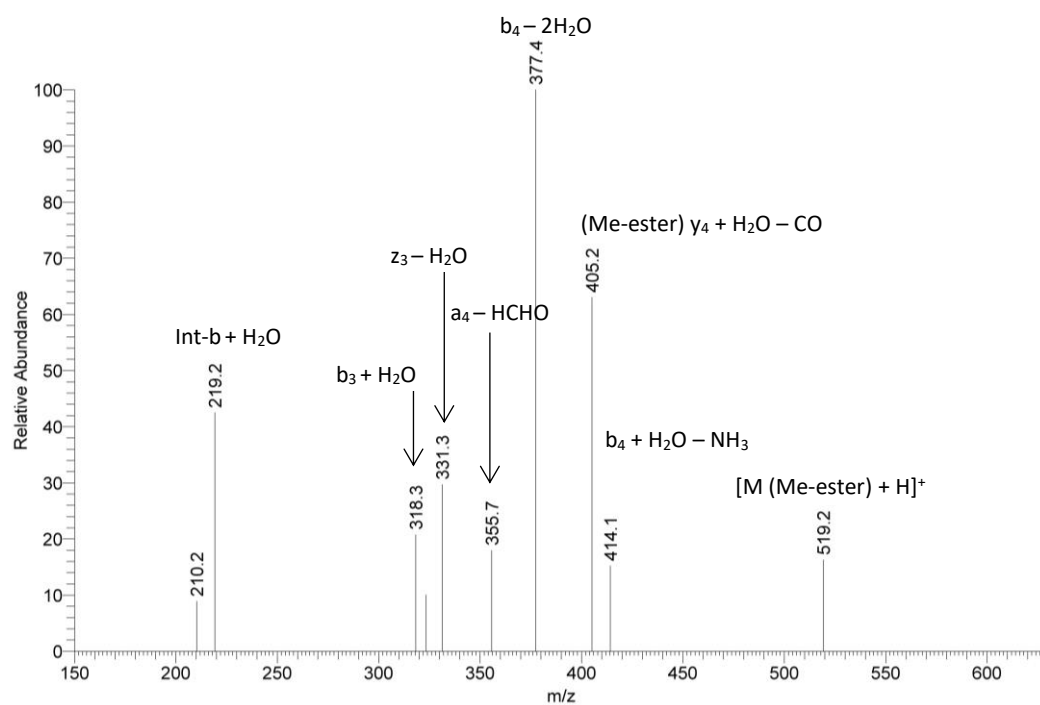

**Figure S8.** MS<sup>2</sup> spectra of acetylated VASLF precursor  $[M (\text{Me-ester}) + H]^+$   $m/z$  519.2.

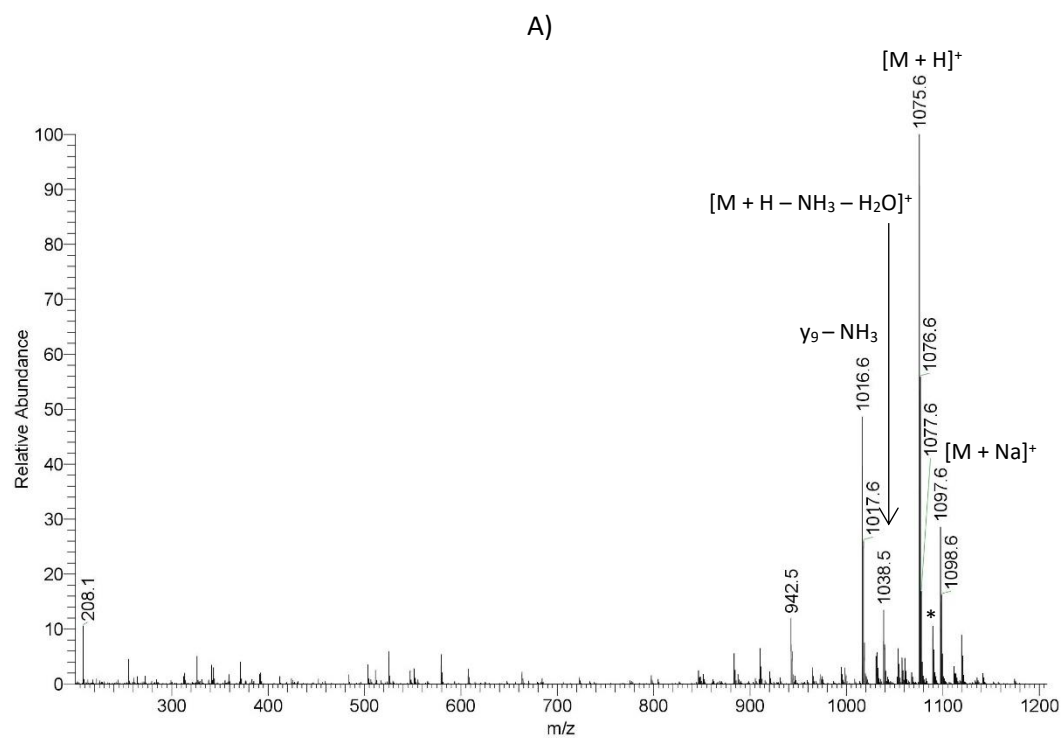

\* $m/z = 1089.6$   $[M (Me\text{-}ester) + H]^+$

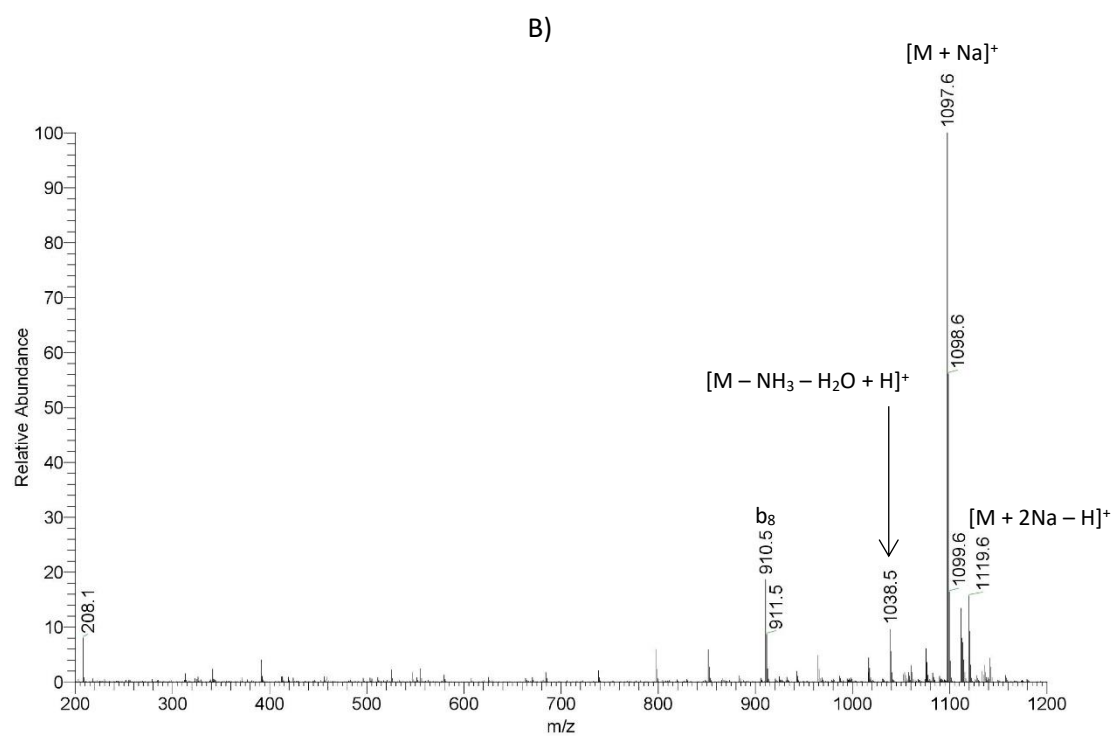

**Figure S9.** FTMS spectra of acetylated QTALVELLF detected in A) APCI and B) APPI.

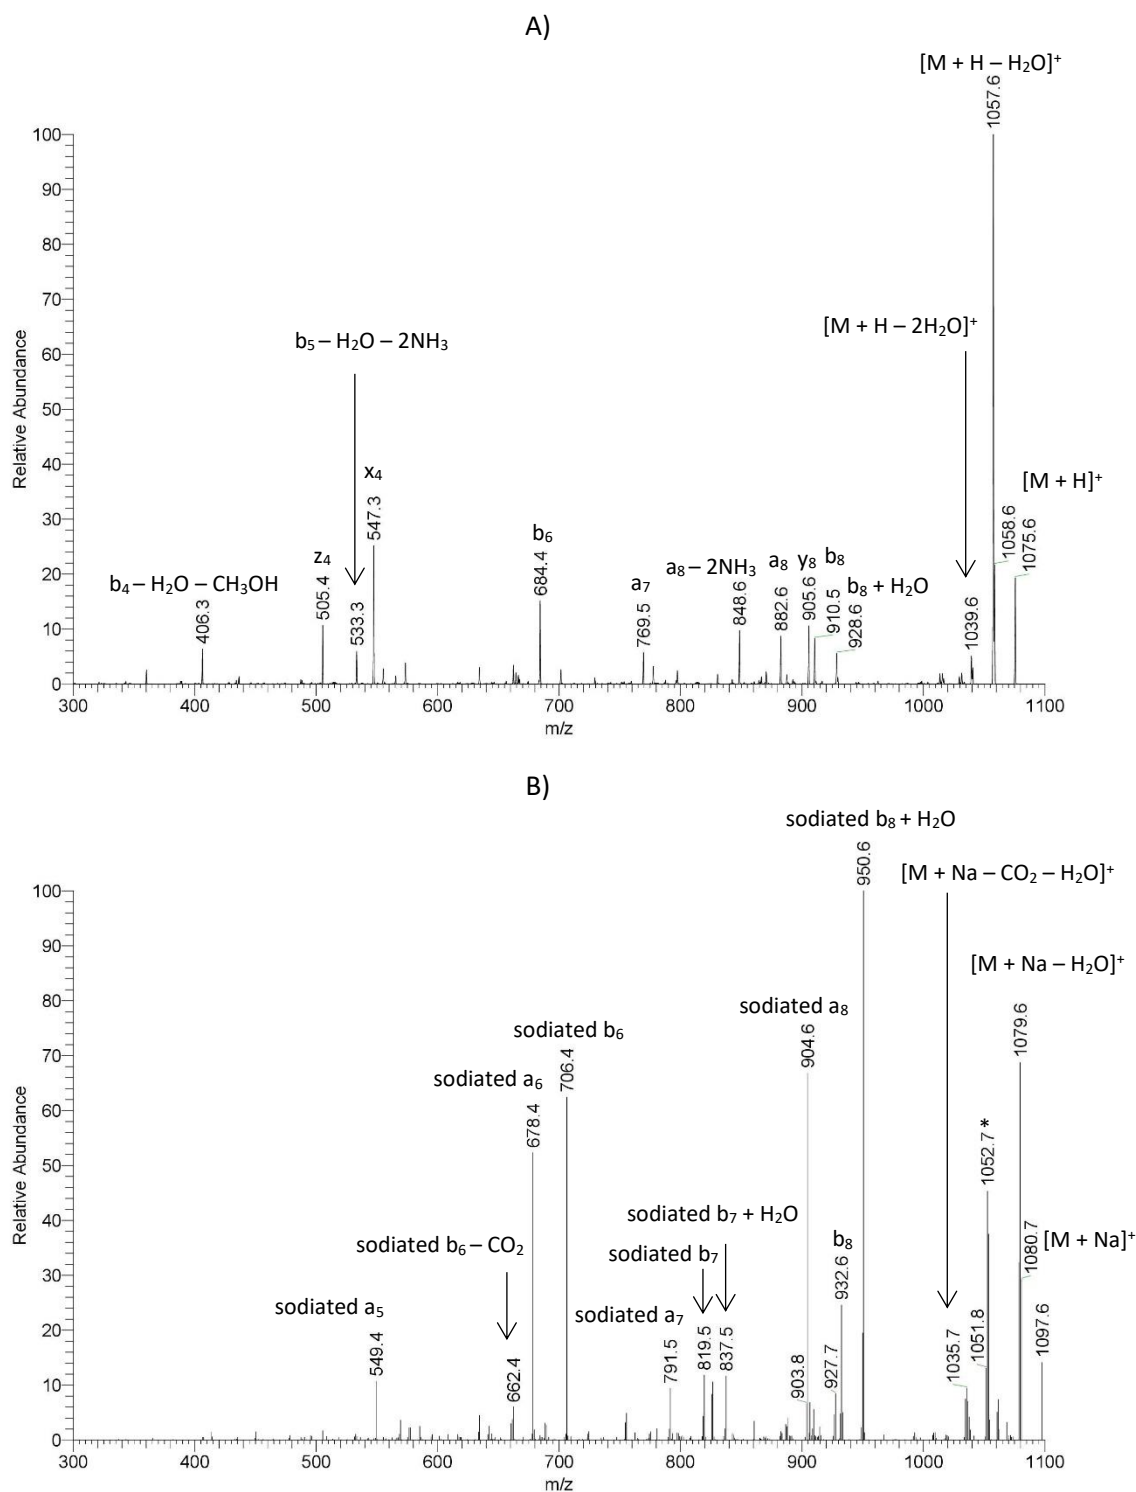

\*  $m/z$  1052.7 =  $[M + Na - CO - NH_3]^+$

**Figure S10.** MS<sup>2</sup> spectra of acetylated QTALVELLF A) precursor  $[M + H]^+$   $m/z$  1075.6, B) precursor  $[M + Na]^+$   $m/z$  1097.6.

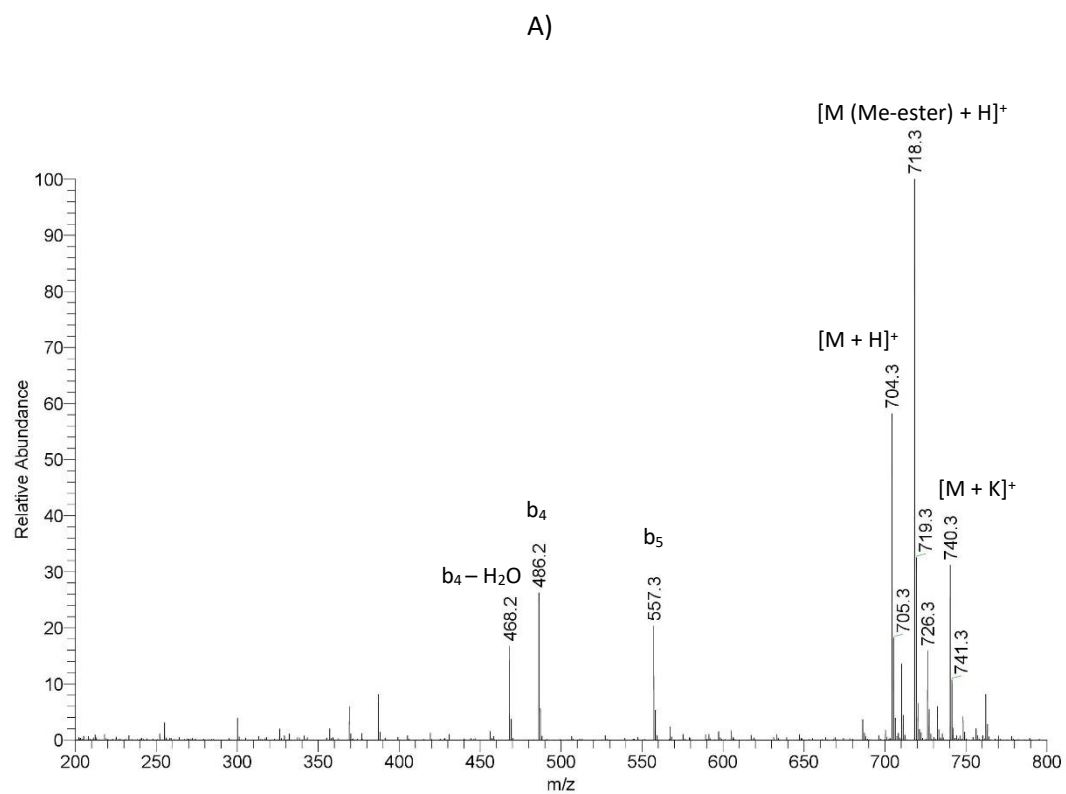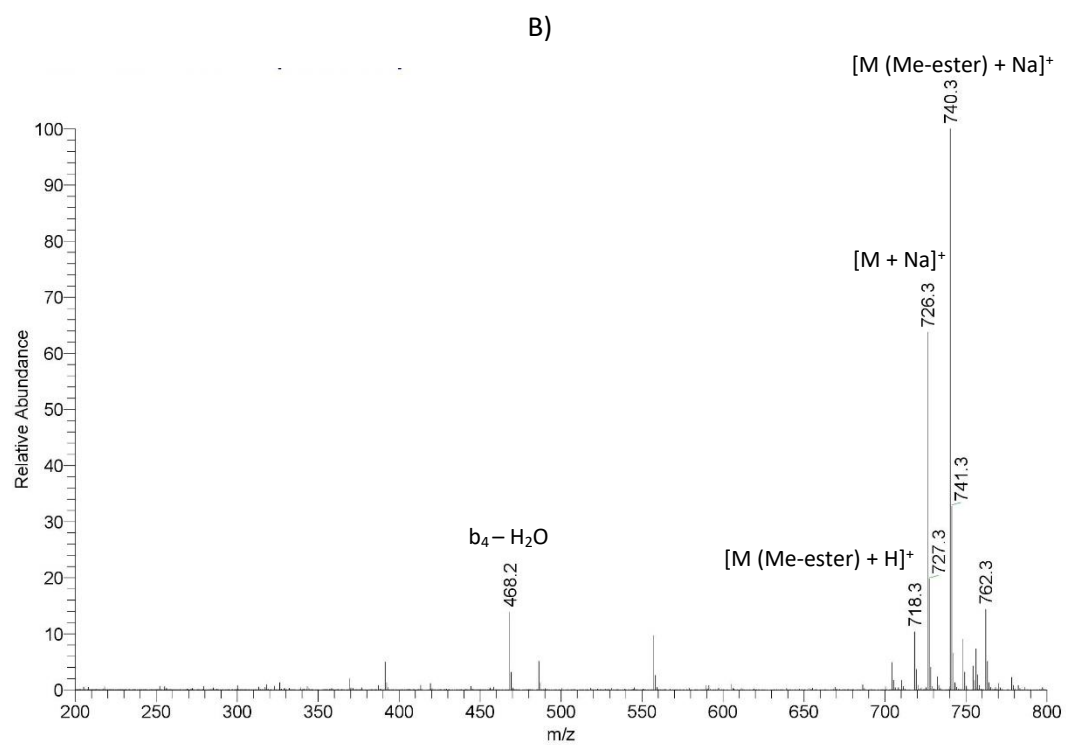

**Figure S11.** FTMS spectra of acetylated AWSVAE detected in A) APCI and B) APPI.

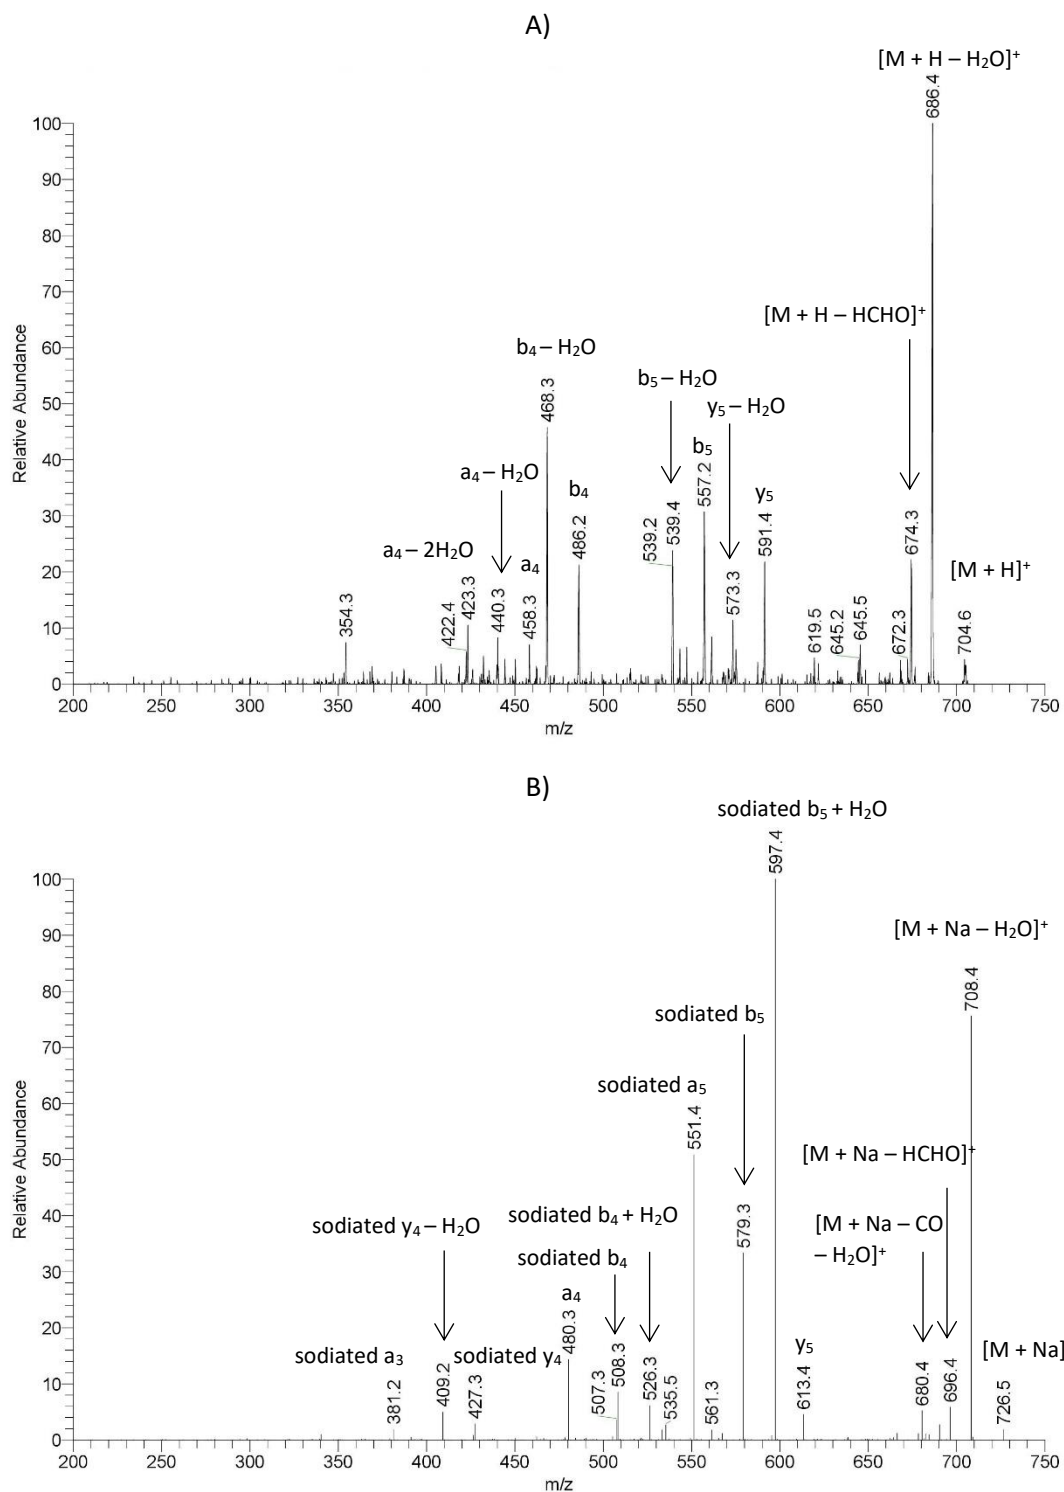

Figure S12. MS<sup>2</sup> spectra of acetylated AWSVAE A) precursor  $[M + H]^+$   $m/z$  704.6, B) precursor  $[M + Na]^+$   $m/z$  726.5.

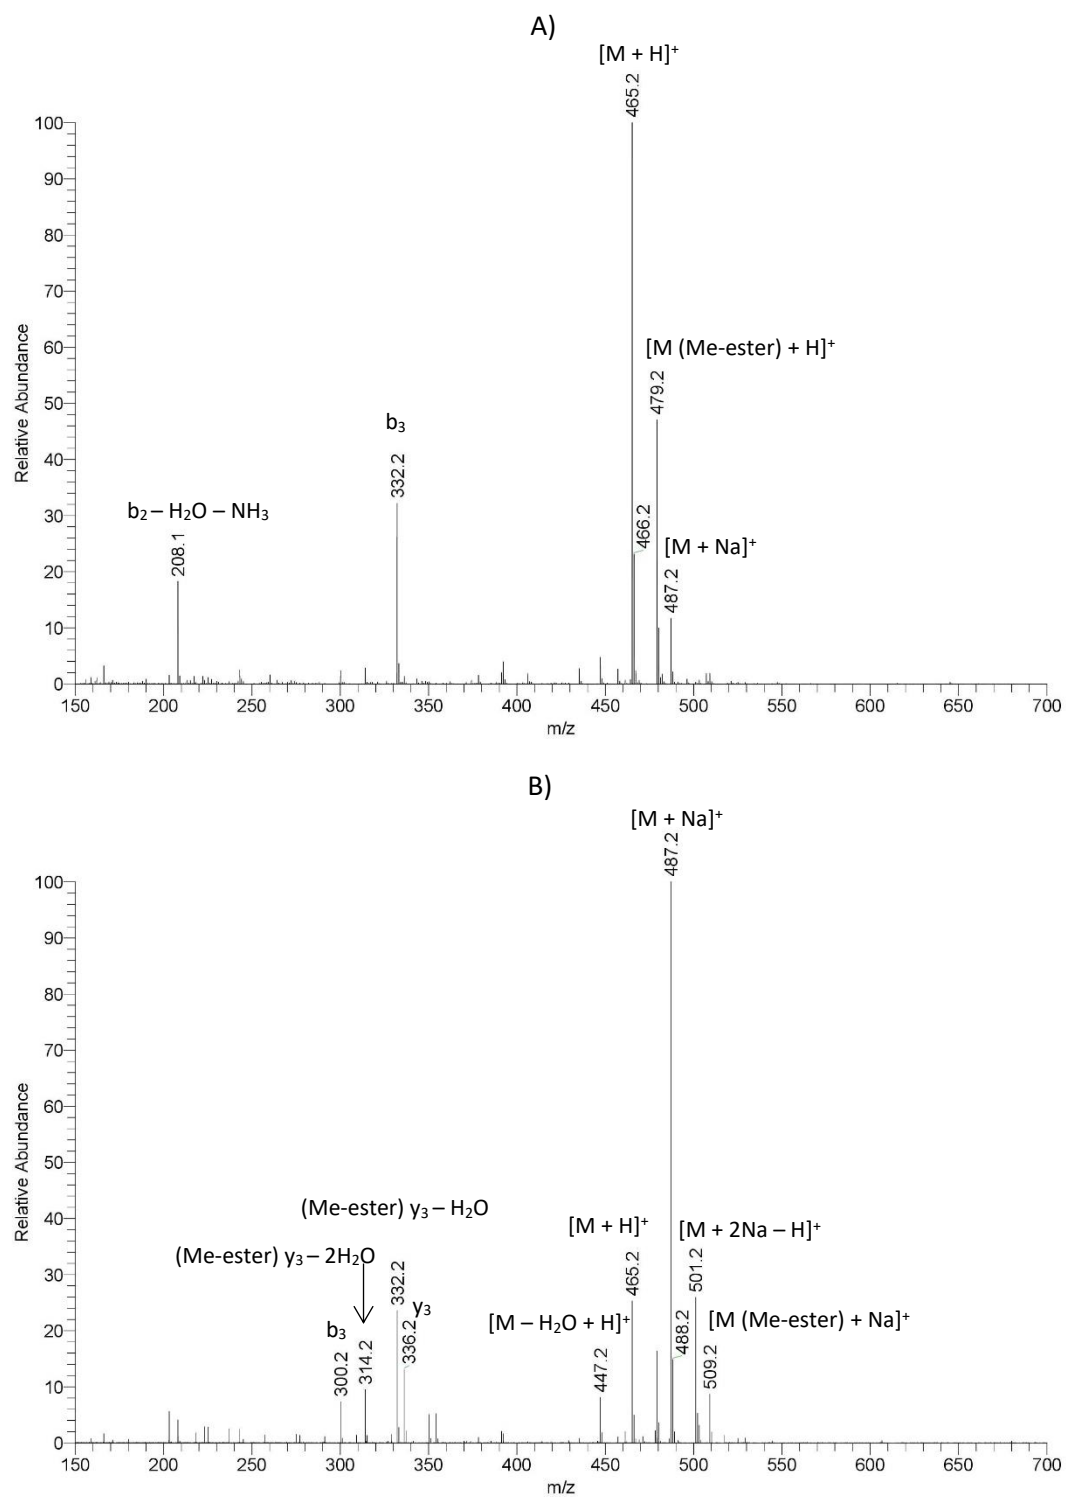

**Figure S13.** FTMS spectra of acetylated SLGF detected in A) APCI and B) APPI.

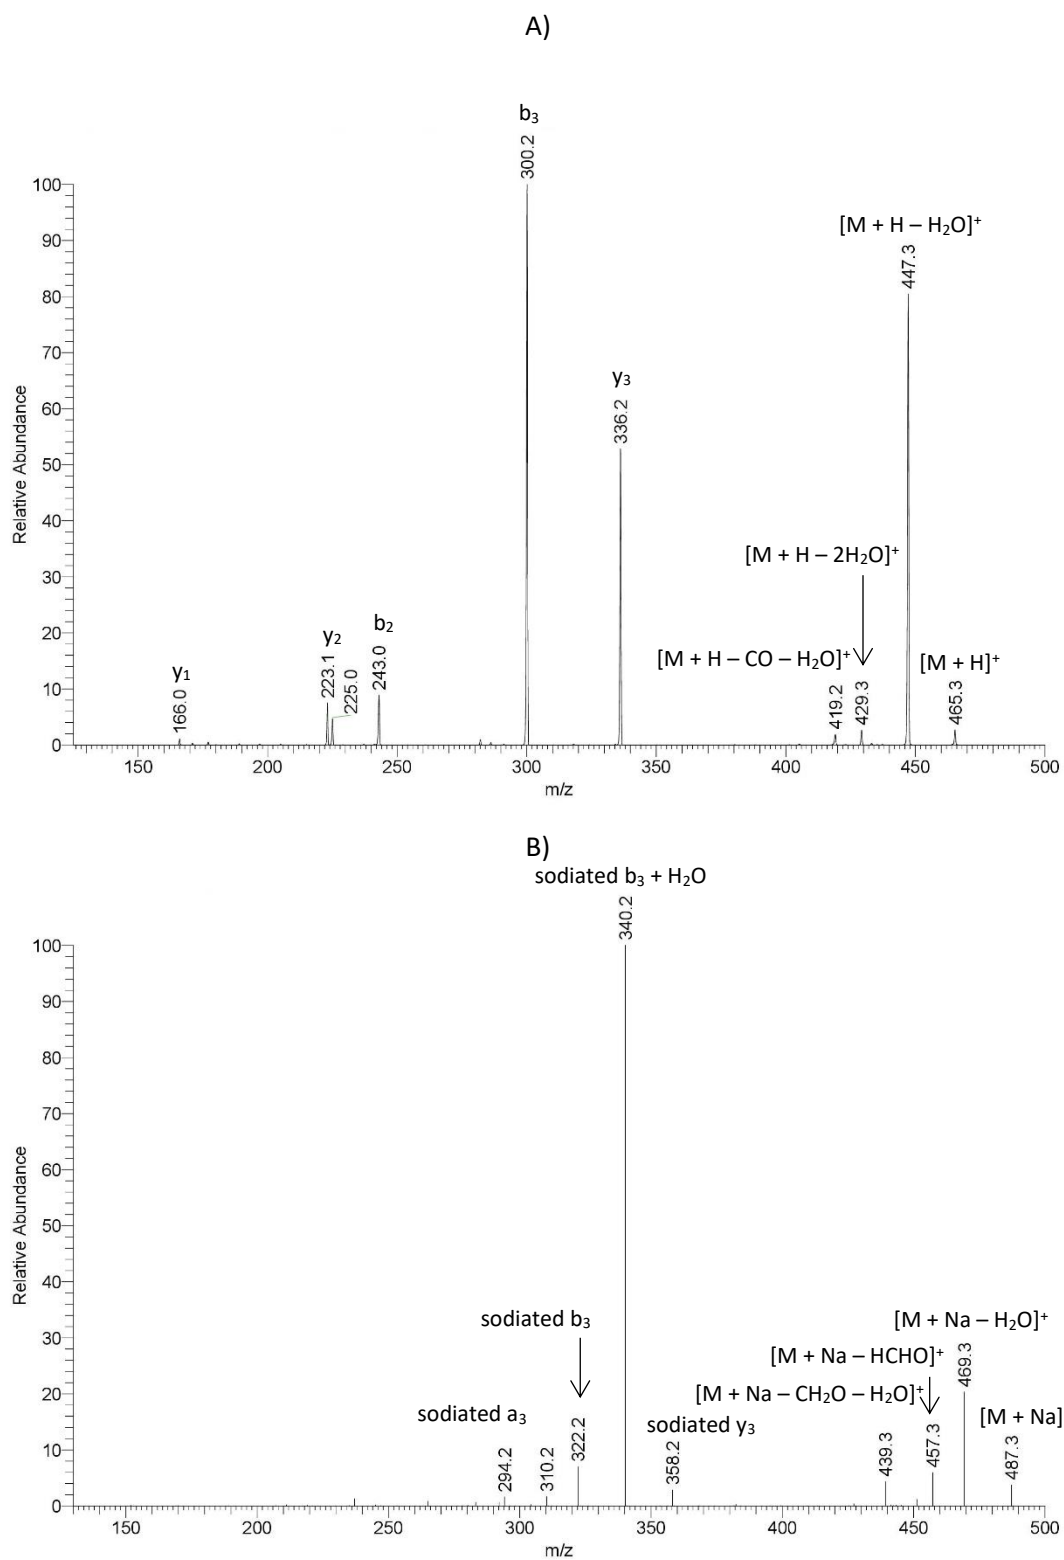

**Figure S14.** MS<sup>2</sup> spectra of acetylated SLGF A) precursor  $[M + H]^+$   $m/z$  465.3, B) precursor  $[M + Na]^+$   $m/z$  487.3.

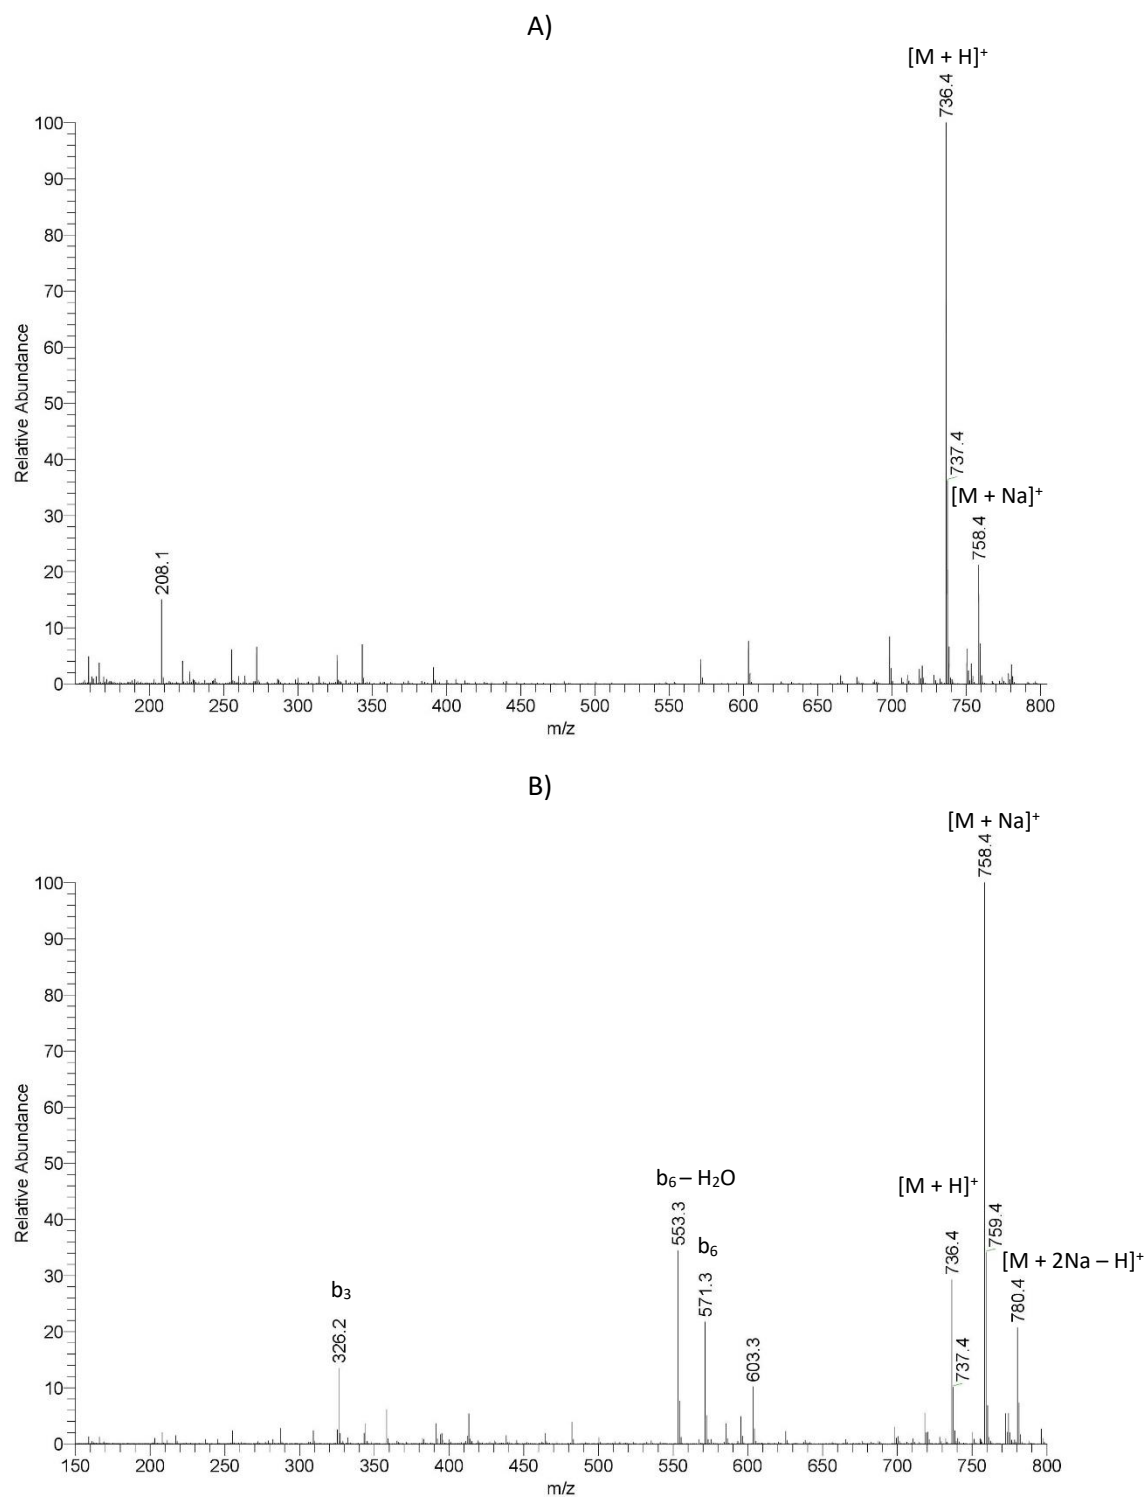

**Figure S15.** FTMS spectra of acetylated VLASSAF detected in A) APCI and B) APPI.



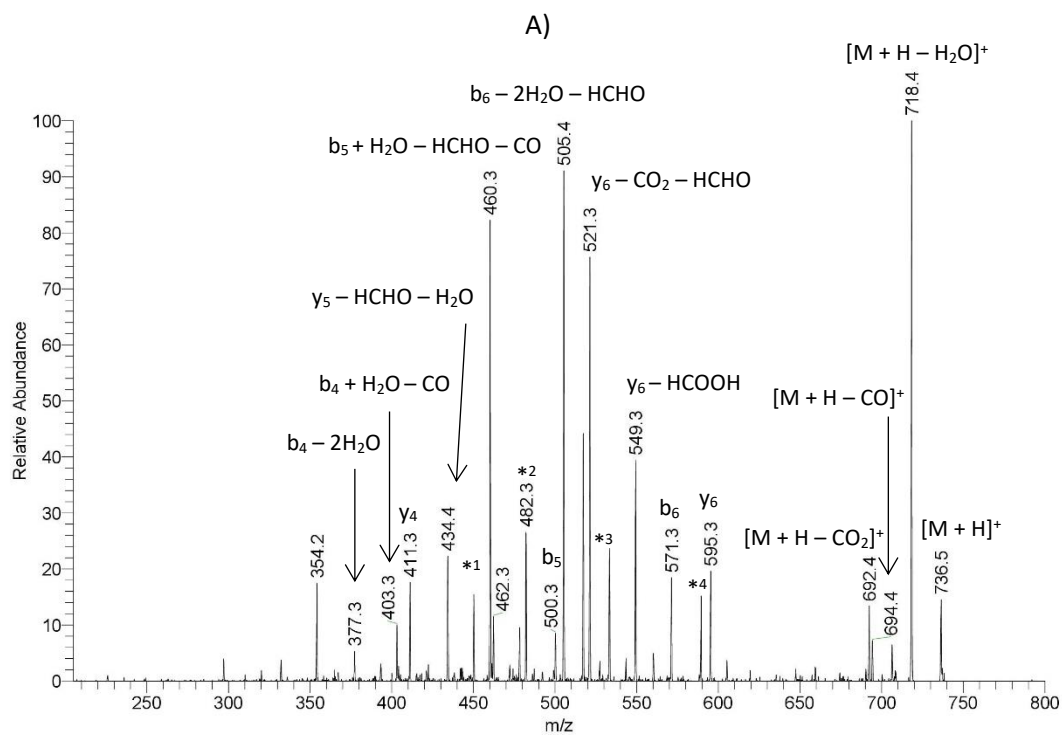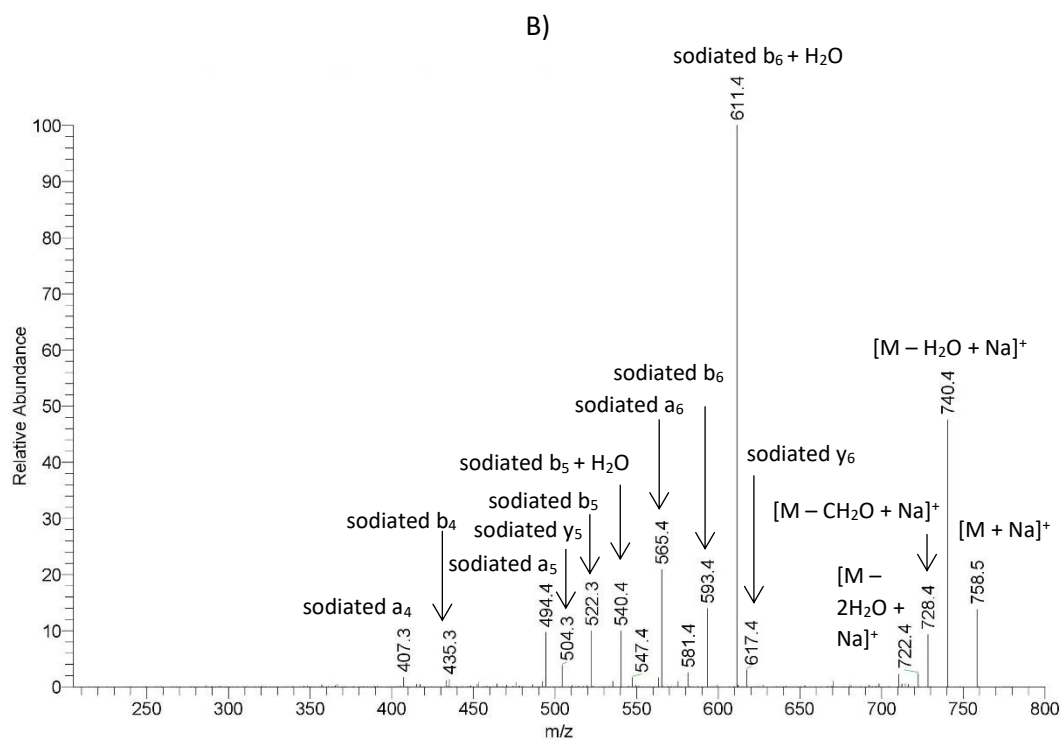

**Figure S16.** MS<sup>2</sup> spectra of acetylated VLASSAF A) precursor  $[M + H]^+$  m/z 736.5, B) precursor  $[M + Na]^+$  m/z 758.5.

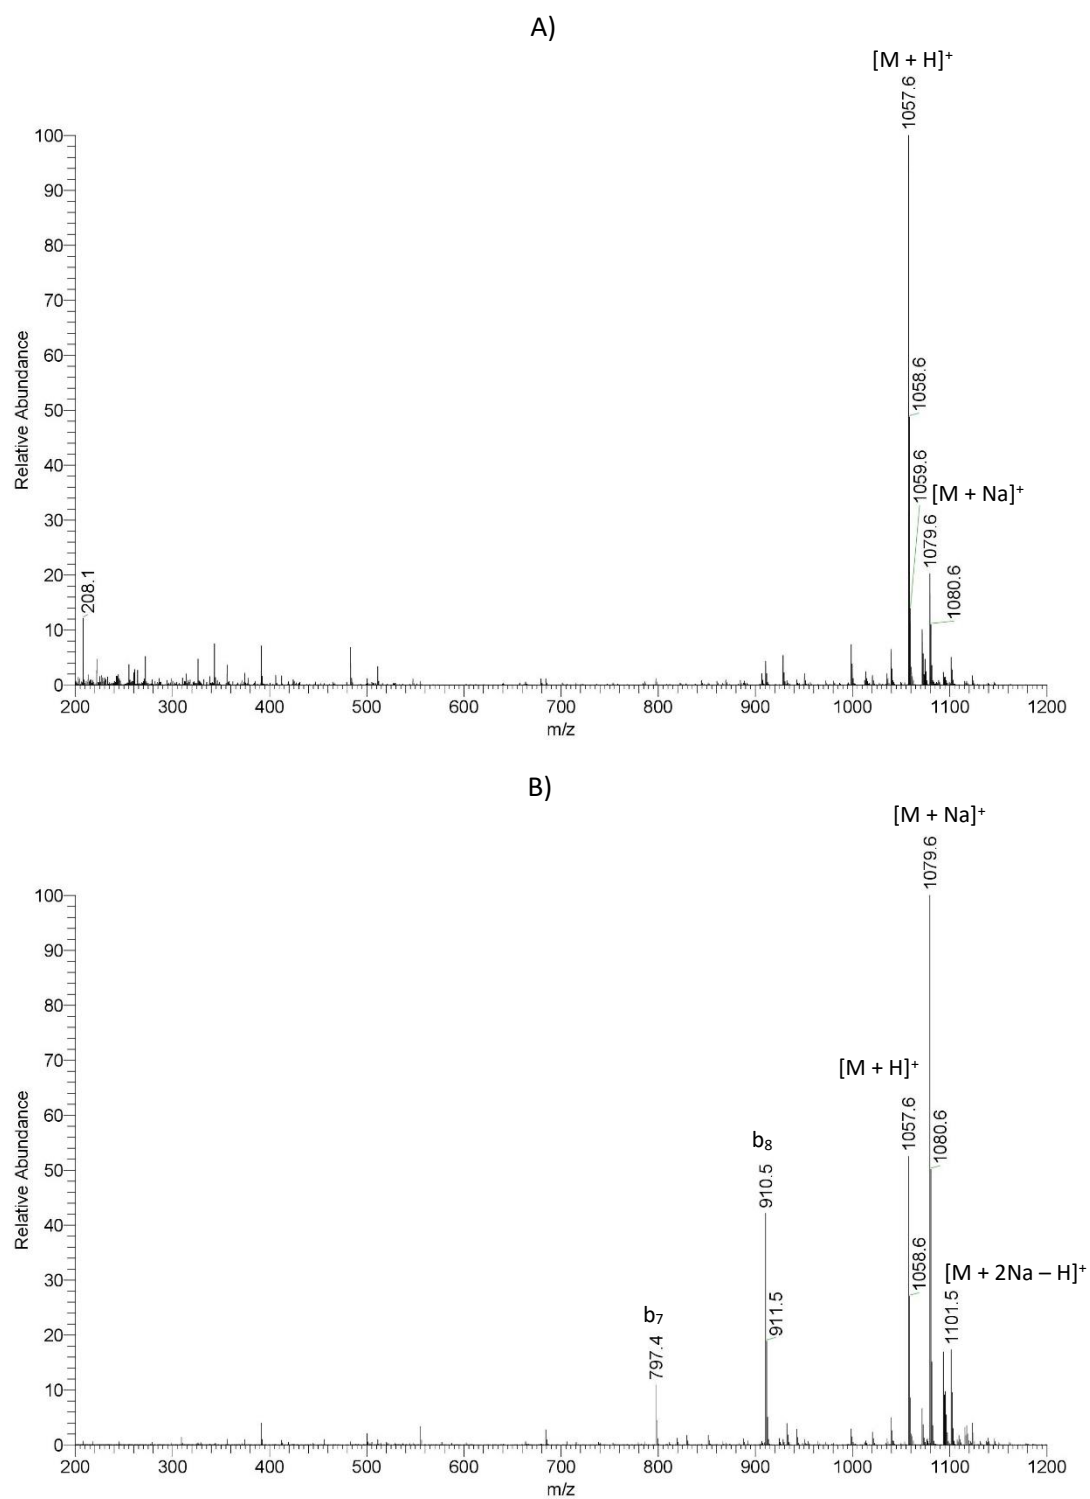

**Figure S17.** FTMS spectra of acetylated QTALVELLE detected in A) APCI and B) APPI.

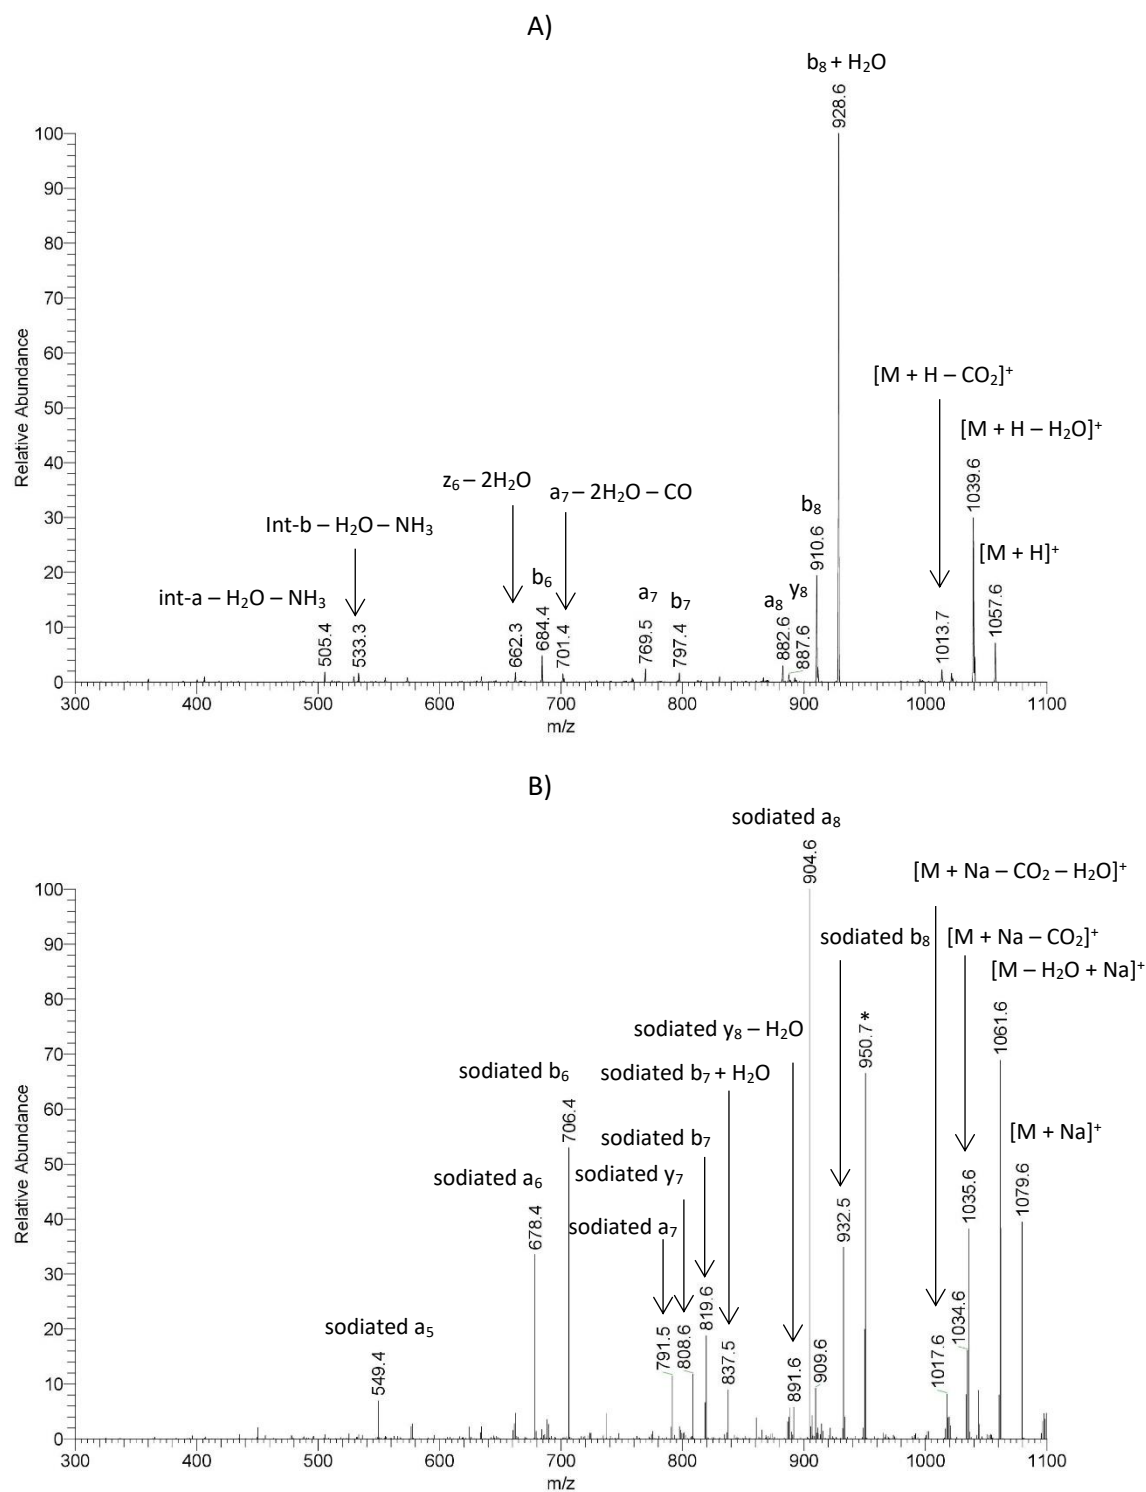

\*  $m/z$  950.7 = sodiated  $b_8$

**Figure S18.** MS<sup>2</sup> spectra of acetylated QTALVELLE A) precursor  $[M + H]^+$   $m/z$  1057.6, B) precursor  $[M + Na]^+$   $m/z$  1079.6.

**Table S1.** Peptides detected by APPI in BSA digested by chymotrypsin. BSA was a) unmodified, or with b) acetylated  $\epsilon$  amines of lysine side chain c) acetylated  $\epsilon$  amines of lysine side chain together with peptides N-termini.

| Peptides detected by APPI |                                   |                            |
|---------------------------|-----------------------------------|----------------------------|
| Non-acetylated            | Acetylated $\epsilon$ amines of K | Acetylated K and N-termini |
| AKEY                      | DEHVKL                            | AKTCVADESHAGCEKSL          |
| AKY                       | DKLKHLVDEPQNL                     | ANKYNGVF                   |
| AVSVL                     | EIARRHPY                          | AVEGPKL                    |
| DEHVKL                    | FLSHKDDSPDLPKL                    | AVEGPKLVVSTQTALA           |
| DEKLF                     | GDMADCCEKQEPERNEC                 | DEHVKL                     |
| EKL                       | GERAL                             | DKL                        |
| GFQNAL                    | GFQNAL                            | DKLKHLVDEPQNL              |
| IAFSQY                    | ILNRL                             | EIARRHPY                   |
| ILNRL                     | IVRY                              | GERAL                      |
| IVRY                      | KADEKKF                           | GFQNAL                     |
| KADEKKF                   | KADEKKFW                          | ILNRL                      |
| KAW                       | KDLGEEHF                          | IVRY                       |
| KGL                       | KECCDKPL                          | KADEKKF                    |
| KGLVL                     | LPKIETMREKVL                      | KAW                        |
| KTVMENF                   | LQQCPF                            | KDLGEEHF                   |
| KTVMENFVAF                | LRLAKEY                           | KECCDKPL                   |
| LGSF                      | NRLCVL                            | KGLVL                      |
| LQQCPF                    | RCASIQKF                          | KHLVDEPQNL                 |
| QNAL                      | RLAKEY                            | LPKIETMREKVL               |
| SQKFPKAEF                 | SQKFPKAEF                         | LQQCPF                     |
| STVF                      | SQKFPKAEFVEVTKL                   | LRLAKEY                    |
| SVARL                     | SVARL                             | RCASIQKF                   |
| VAF                       | TRKVPQVSTPTLVEVSRSL               | RLAKEY                     |
| VELL                      | VEVTKL                            | SQKFPKAEF                  |
| VEVTKL                    | VNELTEF                           | SQKFPKAEFVEVTKL            |
| VLIAF                     | VPKAFDEKLF                        | SVARL                      |
| VNELTEF                   | YEYSRRHPEY                        | TRKVPQVSTPTLVEVSRSL        |
| VPKAF                     |                                   | VAF                        |
| WGKY                      |                                   | VELLKHKPKATE EQL           |
| YANKY                     |                                   | VEVTKL                     |
|                           |                                   | VLIAF                      |
|                           |                                   | VNELTEF                    |
|                           |                                   | VPKAFDEKLF                 |
|                           |                                   | YANKY                      |

**Table S2.** Peptides detected by APCI in BSA digested by chymotrypsin. BSA was a) unmodified, or with b) acetylated  $\epsilon$  amines of lysine side chain c) acetylated  $\epsilon$  amines of lysine side chain together with peptides N-termini.

| Peptides detected by APCI |                                   |                            |
|---------------------------|-----------------------------------|----------------------------|
| Non-acetylated            | Acetylated $\epsilon$ amines of K | Acetylated K and N-termini |
| AKEY                      | AKEY                              | AKEY                       |
| APELL                     | ANKY                              | ANKY                       |
| AVSVL                     | APELL                             | APELL                      |
| AVSVLL                    | APELLY                            | APELLY                     |
| DEHVKL                    | AVEGPKL                           | AVEGPKL                    |
| DEKLF                     | AVSVL                             | AVSVL                      |
| FYAPEL                    | AVSVLL                            | AVSVLL                     |
| GERAL                     | DEHVKL                            | DEKLF                      |
| GFQNAL                    | DEKLF                             | EKLGEY                     |
| IAFSQY                    | EKLGEY                            | GERAL                      |
| ILNRL                     | GERAL                             | GFQNAL                     |
| ISLL                      | GFQNAL                            | GSFL                       |
| IVRY                      | GSFL                              | IAFSQY                     |
| KADEKKFW                  | IAFSQY                            | ILNRL                      |
| KAW                       | ILNRL                             | IVRY                       |
| KGLVL                     | ISLLL                             | KADEKKF                    |
| KTMENF                    | IVRY                              | KAW                        |
| KTMENFVAF                 | KADEKKFW                          | KGLVL                      |
| LGSF                      | KAW                               | KPDPNTL                    |
| SQKFPKAEF                 | KGL                               | KTMENF                     |
| STVF                      | KGLVL                             | LGSF                       |
| STVFDKL                   | KPDPNTL                           | LYEY                       |
| SVARL                     | KTMENF                            | NGVF                       |
| VEVTKL                    | LGSF                              | SQKFPKAEF                  |
| VLIAF                     | LQQCPF                            | STVF                       |
| VNELTEF                   | LYEY                              | SVARL                      |
| VPKAF                     | MKWVTF                            | VELL                       |
| VPKAFDEKLF                | NGVF                              | VEVTKL                     |
| WGKY                      | SQKFPKAEF                         | VLIAF                      |
|                           | STVF                              | VNELTEF                    |
|                           | STVFDKL                           | VPKAF                      |
|                           | SVARL                             | VPKAFDEKLF                 |
|                           | VELL                              | VTDL                       |
|                           | VEVTKL                            | WGKY                       |
|                           | VNELTEF                           | YANKY                      |
|                           | VPKAF                             | YAPELL                     |
|                           | VPKAFDEKLF                        |                            |
|                           | VTDL                              |                            |
|                           | WGKY                              |                            |
|                           | YANKY                             |                            |
|                           | YAPELL                            |                            |

**Table S3.** Peptides detected by ESI in BSA digested by chymotrypsin. BSA was a) unmodified, or with b) acetylated  $\epsilon$  amines of lysine side chain c) acetylated  $\epsilon$  amines of lysine side chain together with peptides N-termini.

| Peptides detected by ESI |                                   |                            |
|--------------------------|-----------------------------------|----------------------------|
| Non-acetylated           | Acetylated $\epsilon$ amines of K | Acetylated K and N-termini |
| AEDKDVCKNY               | AEDKDVCKNY                        | ANKY                       |
| AKEY                     | CKVASL                            | AVEGPKLVVSTQTALA           |
| AVEGPKLVVSTQTALA         | DKLKHLVDEPQNL                     | AVSVL                      |
| DEHVKL                   | EATLEECCA KDDPHACY                | AVSVLL                     |
| DEHVKL VNELTEF           | GFQNAL                            | DEHVKL                     |
| DEKLF                    | ICDNQDTISSKL                      | DEKLF                      |
| DKLKHLVDEPQNL            | IKQNCDQFEKLGEY                    | DKLKHLVDEPQNL              |
| GERAL                    | KADEK KFW                         | EATLEECCA KDDPHACY         |
| GFQNAL                   | KDLGEEHF                          | GERAL                      |
| GFQNALIVRY               | KECCDKPL                          | GFQNAL                     |
| ICDNQDTISSKL             | KGLVL                             | IAFSQY                     |
| IKQNCDQF                 | KHKPKATEEQL                       | IKQNCDQFEKLGEY             |
| IKQNCDQFEKLGEY           | KHKPKATEEQLKTVMENF                | KADEKKF                    |
| ILNRL                    | KTVMENF                           | KDLGEEHF                   |
| IVRY                     | LPKIETMREKVL                      | KGLVL                      |
| KDLGEEHF                 | LQQCPF                            | KHKPKATEEQL                |
| KDLGEEHFKGL              | LRLAKEY                           | KHKPKATEEQLKTVMENF         |
| KHKPKATEEQL              | NGVFQECCQAEDKGACL                 | KHKPKATEEQLKTVMENFVAF      |
| KTVMENFVAF               | QEAKDAF                           | KTVMENFVAF                 |
| LGSF                     | RCASIQKF                          | LGSF                       |
| LQQCPFDEHVKL             | SALTPDETYVPKAF                    | LKHKPKATEEQLKTVMENF        |
| NGVFQECCQAEDKGACL        | SQKFPKAEF                         | LQQCPF                     |
| QEAKDAF                  | VDKCCAADDKEACF                    | LQQCPFDEHVKL               |
| QEAKDAFLGSF              | VEVTKL                            | LRLAKEY                    |
| QECCQAEDKGACL            | VLIAF                             | QEAKDAF                    |
| RLAKEY                   | VNELTEF                           | QECCQAEDKGACL              |
| SALTPDETYVPKAF           | VPKAFDEKLF                        | RCASIQKF                   |
| SQKFPKAEF                |                                   | RLAKEY                     |
| TPDETY                   |                                   | SQKFPKAEF                  |
| VDKCCAADDKEACF           |                                   | SQKFPKAEFVEVTKL            |
| VEVTKLVTDL               |                                   | STVF                       |
| VLIAF                    |                                   | SVARL                      |
| VNELTEF                  |                                   | TRKVPQVSTPTLVEVSRSL        |
| VPKAF                    |                                   | VEVTKL                     |
| VPKAFDEKLF               |                                   | VEVTKLVTDL                 |
|                          |                                   | VLIAF                      |
|                          |                                   | VNELTEF                    |
|                          |                                   | VPKAF                      |
|                          |                                   | VPKAFDEKLF                 |
|                          |                                   | WGKY                       |

**Table S4.** Peptides detected by APPI in BSA digested by Glu-C. BSA was a) unmodified, or with b) acetylated  $\epsilon$  amines of lysine side chain c) acetylated  $\epsilon$  amines of lysine side chain together with peptides N-termini.

| Peptides detected by APPI |                                   |                            |
|---------------------------|-----------------------------------|----------------------------|
| Non-acetylated            | Acetylated $\epsilon$ amines of K | Acetylated K and N-termini |
| ACFAVE                    | ACFAVE                            | ACFAVE                     |
| AFLGSFLYE                 | AFLGSFLYE                         | AFLGSFLYE                  |
| AKDAFLGSFLYE              | CADDRAD                           | AKDAFLGSFLYE               |
| CCDKPLLE                  | CCAKD D                           | CCDKPLLE                   |
| DKGACLLPKIE               | CCDKPLLE                          | CCQAE                      |
| FAKTCVADE                 | DKE                               | CCHGDLLE                   |
| FKADE                     | DKGACLLPKIE                       | DKEACFAVE                  |
| GPKLVVSTQTALA             | DRAD                              | DKGACLLPKIE                |
| HVKLVNE                   | DYLSLILNRLCVLHE                   | DYLSLILNRLCVLHE            |
| IAHRFKDLGEE               | EQLKTVME                          | EQLKTVME                   |
| IARRHPYFYAPE              | ETYVPKAFD                         | ETYVPKAFD                  |
| ICTLPDTE                  | FAKTCVADE                         | FAKTCVADE                  |
| KDAIPE                    | FVE                               | FKADE                      |
| KGACLLPKIE                | GPKLVVSTQTALA                     | GPKLVVSTQTALA              |
| KKFWGKLYE                 | HVKLVNE                           | HVKLVNE                    |
| KLFTFHAD                  | IAHRFKD                           | IAHRFKD                    |
| KLGE                      | IAHRFKDLGEE                       | IAHRFKDLGEE                |
| KPLLE                     | IARRHPYFYAPE                      | IARRHPYFYAPE               |
| KQEPE                     | ICTLPDTE                          | ICTLPDTE                   |
| KQEPERNE                  | KDAIPE                            | KDAIPE                     |
| KQIKKQTALVE               | KGACLLPKIE                        | KKFWGKLYE                  |
| KSHCIAE                   | KLFTFHAD                          | KLFTFHAD                   |
| KSLHTLFGDE                | KLGE                              | KQEPE                      |
| KTPVSE                    | KPLLE                             | KQEPERNE                   |
| KVTKCCTE                  | KSHCIAE                           | KSHCIAE                    |
| LCKVASLRE                 | KSLHTLFGDE                        | KSLHTLFGDE                 |
| LLKHKPKATE                | KTPVSE                            | KTPVSE                     |
| LLKHKPKATEE               | LCKVASLRE                         | LCKVASLRE                  |
| LTKVHKE                   | LLKHKPKATE                        | LLKHKPKATE                 |
| NLPPLTADFAE               | LLKHKPKATEE                       | LLKHKPKATEE                |
| QLKTVME                   | LTKVHKE                           | LLYYANKYNGVFQE             |
| SHAGCE                    | NFVAFVD                           | LTKVHKE                    |
| TYVPKAFDE                 | NLPPLTADFAE                       | NLPPLTADFAE                |
| VEKDAIPE                  | QFEKLGEYGFQNALIVRYTRKVPQVSTPTLVE  | NQDTISSKLKE                |
| VTKLVTD                   | RALKAWSVARLSQKFPKAE               | QLKTVME                    |
| VTKLVTDLTKVHKE            | RMPCTE                            | RALKAWSVARLSQKFPKAE        |
|                           | RNE                               | RMPCTE                     |
|                           | VEKDAIPE                          | SERMPCTE                   |
|                           | VSRSLGKVGTRCCTKPESE               | SHAGCE                     |
|                           | VTKLVTD                           | SLVNRRPCFSALTPDE           |
|                           | YAVSVLLRLAKE                      | TEKQIKKQTALVE              |
|                           | YGFQNALIVRYTRKVPQVSTPTLVE         | TYVPKAFDE                  |
|                           | YLSLILNRLCVLHEKTPVSE              | VEKDAIPE                   |
|                           | YSRRHPE                           | VTKLVTD                    |
|                           |                                   | YAVSVLLRLAKE               |
|                           |                                   | YEATLE                     |

**Table S5.** Peptides detected by APCI in BSA digested by Glu-C. BSA was a) unmodified, or with b) acetylated  $\epsilon$  amines of lysine side chain c) acetylated  $\epsilon$  amines of lysine side chain together with peptides N-termini.

| Peptides detected by APCI |                                   |                            |
|---------------------------|-----------------------------------|----------------------------|
| Non-acetylated            | Acetylated $\epsilon$ amines of K | Acetylated K and N-termini |
| ACFAVE                    | ACFAVE                            | ACFAVE                     |
| AFLGSFLYE                 | AFLGSFLYE                         | AFLGSFLYE                  |
| AKDAFLGSFLYE              | ATLE                              | ATLE                       |
| ATLE                      | FKADE                             | DKEACFAVE                  |
| CCQAE                     | FVE                               | EHVKLVNE                   |
| DKGACLLPKIE               | GPQLVVSTQTALA                     | EQLKTVME                   |
| FKADE                     | HVKLVNE                           | FKADE                      |
| GPQLVVSTQTALA             | ICTLPDTE                          | GPQLVVSTQTALA              |
| KGACLLPKIE                | KDAIPE                            | HVKLVNE                    |
| KKFWGKYLIE                | KGACLLPKIE                        | ICTLPDTE                   |
| KLGE                      | KLGE                              | KDAIPE                     |
| KQEPE                     | KPLLE                             | KLFTFHAD                   |
| KQIKKQTALVE               | KQEPE                             | KLGE                       |
| KTPVSE                    | KSHCIAE                           | KSHCIAE                    |
| LLKHKPKATE                | KTPVSE                            | KSLHTLFGDE                 |
| LLKHKPKATEE               | LAKYICD                           | KTPVSE                     |
| LTKVHKE                   | LGEE                              | LCKVASLRE                  |
| QLKTVME                   | LLKHKPKATE                        | LTKVHKE                    |
| TISSKLKE                  | LTKVHKE                           | NLPPLTADFAE                |
| TYVPKAFDE                 | NLPPLTADFAE                       | QLKTVME                    |
| VTKLVTD                   | VTKLVTD                           | SLVNRRPCFSALTPDE           |
|                           | YEATLE                            | VTKLVTD                    |
|                           |                                   | YAVSVLLRLAKE               |



**Table S6.** Peptides detected by ESI in BSA digested by Glu-C. BSA was a) unmodified, or with b) acetylated  $\epsilon$  amines of lysine side chain c) acetylated  $\epsilon$  amines of lysine side chain together with peptides N-termini.

| Peptides detected by ESI |                                   |                            |
|--------------------------|-----------------------------------|----------------------------|
| Non-acetylated           | Acetylated $\epsilon$ amines of K | Acetylated K and N-termini |
| ACFAVEGPKLVVSTQTALA      | ACFAVE                            | ACFAVE                     |
| AKDAFLGSFLYE             | AFLGSFLYE                         | AKDAFLGSFLYE               |
| ATLEE                    | CCDKPLLE                          | ATLEE                      |
| CCAKDDPHACYSTVFD         | DKGACLLPKIE                       | CCDKPLLE                   |
| CCQAE                    | FAKTCVADE                         | CCQAE                      |
| CCHGDLLE                 | HVKLVNE                           | CCHGDLLE                   |
| DKDVCKNYQE               | IARRHPYFYAPE                      | DKGACLLPKIE                |
| EQLKTVME                 | ICTLPDTE                          | DYLSLILNRLCVLHE            |
| ETYVPKAFDE               | KLFTFHAD                          | FAKTCVADE                  |
| FAKTCVADE                | KLGE                              | FKADE                      |
| FAKTCVADESHAGCE          | KQIKKQTALVE                       | GPKLVVSTQTALA              |
| FKADE                    | KSHCIAE                           | HVKLVNE                    |
| HVKLVNE                  | KTPVSE                            | IAHRFKD                    |
| KDAIPE                   | KVTKCCTE                          | IAHRFKDLGEE                |
| KLGE                     | LCKVASLRE                         | IARRHPYFYAPE               |
| KQEPE                    | LLKHKPKATE                        | KDAIPE                     |
| KQEPERNE                 | LLKHKPKATEE                       | KKFWGKLYLE                 |
| KSHCIAE                  | NLPPLTADFAE                       | KLFTFHAD                   |
| KVTKCCTE                 | QLKTVME                           | KLGE                       |
| LCKVASLRE                | RALKAWSVARLSQKFPKAE               | KQEPE                      |
| LLKHKPKATE               | RMPCTE                            | KQIKKQTALVE                |
| LLYYANKYNGVFQE           | SLVNRRPCFSALTPDE                  | KSHCIAE                    |
| LTKVHKE                  | TYVPKAFDE                         | KTPVSE                     |
| QLKTVME                  | VSRSLGKVGTRCCTKPE                 | KVTKCCTE                   |
| RMPCTE                   | VTKLVTD                           | LCKVASLRE                  |
| SERMPCTE                 |                                   | LLKHKPKATE                 |
| SHAGCE                   |                                   | LLKHKPKATEE                |
| TYGDMADCCE               |                                   | LLYYANKYNGVFQE             |
| VEKDAIPE                 |                                   | QLKTVME                    |
| YAVSVLLRLAKEYE           |                                   | RMPCTE                     |
|                          |                                   | TYVPKAFDE                  |
|                          |                                   | VEKDAIPE                   |
|                          |                                   | VTKLVTD                    |
|                          |                                   | YAVSVLLRLAKE               |
